# Supplementary material for: Inhibition of melanization by serpin-5 and serpin-9 promotes baculovirus infection in cotton bollworm Helicoverpa armigera
Source: PubMed Central journal article supplement (PMC5633200; doi:10.1371/journal.ppat.1006645), 2017-09-27
Supplement: ppat.1006645.s008.pdf [file ppat.1006645.s008.pdf]

**Supplementary Data 1. Pearson pairwise correlation among biological replicates**

|       | 48hM1 | 48hM2 | 48hM3 | 48hI1 | 48hI2 | 48hI3 |
|-------|-------|-------|-------|-------|-------|-------|
| 48hM1 | 1     | 0.94  | 0.94  | 0.83  | 0.78  | 0.72  |
| 48hM2 |       | 1     | 0.99  | 0.84  | 0.76  | 0.68  |
| 48hM3 |       |       | 1     | 0.83  | 0.76  | 0.69  |
| 48hI1 |       |       |       | 1     | 0.97  | 0.94  |
| 48hI2 |       |       |       |       | 1     | 0.99  |
| 48hI3 |       |       |       |       |       | 1     |
|       | 72hM1 | 72hM2 | 72hM3 | 72hI1 | 72hI2 | 72hI3 |
| 72hM1 | 1     | 0.99  | 0.99  | 0.51  | 0.57  | 0.41  |
| 72hM2 |       | 1     | 1.00  | 0.53  | 0.58  | 0.42  |
| 72hM3 |       |       | 1     | 0.53  | 0.59  | 0.43  |
| 72hI1 |       |       |       | 1     | 0.99  | 0.98  |
| 72hI2 |       |       |       |       | 1     | 0.98  |
| 72hI3 |       |       |       |       |       | 1     |
