# Supplementary material for: Inhibition of melanization by serpin-5 and serpin-9 promotes baculovirus infection in cotton bollworm Helicoverpa armigera
Source: PubMed Central journal article supplement (PMC5633200; doi:10.1371/journal.ppat.1006645), 2017-09-27
Supplement: ppat.1006645.s009.pdf [file ppat.1006645.s009.pdf]

## Supplementary Data 2. Identified proteins encoded by baculovirus in infected hemolymph

| ORF    | Protein   | Cluster          | Promoter | Area     |          | Relative abundance |        | p-value     | FC       |
|--------|-----------|------------------|----------|----------|----------|--------------------|--------|-------------|----------|
|        |           |                  |          | 48 hpi   | 72 hpi   | 48 hpi             | 72 hpi |             |          |
| ORF56  | cathepsin | Auxiliary        | L        | 6.49E+09 | 3.42E+10 | 5.703              | 38.967 | < 0.0001    | 6.83     |
| ORF21  | P10       | Structural       | L        | 6.26E+07 | 1.32E+10 | 0.026              | 10.761 | 0.000542571 | 413.88   |
| ORF126 | EGT       | Auxiliary        | L        | 7.66E+09 | 4.84E+09 | 6.553              | 6.531  | 0.979538    | 1        |
| ORF22  | P26       | Structural       | L        | 5.04E+10 | 4.45E+09 | 43.367             | 6.028  | < 0.0001    | 0.14     |
| ORF57  | HA57      | Structural       | E        | 5.42E+08 | 2.65E+09 | 0.411              | 3.614  | < 0.0001    | 8.79     |
| ORF41  | chitinase | Auxiliary/Struct |          | 3.78E+08 | 2.44E+09 | 0.308              | 3.289  | < 0.0001    | 10.68    |
| ORF120 | Calyx/PEP | Structural       | L        | 0.00E+00 | 2.97E+09 | 0                  | 2.984  | < 0.0001    | Infinity |
| ORF68  | HA68      | Structural       | L        | 9.14E+08 | 2.43E+09 | 0.808              | 2.937  | < 0.0001    | 3.63     |
| ORF10  | HA10      | Structural       | L        | 5.00E+08 | 1.62E+09 | 0.409              | 2.129  | < 0.0001    | 5.21     |
| ORF38  | LEF-8     | Structural /Tran |          | 0.00E+00 | 9.42E+08 | 0                  | 1.32   | 0.0649441   | Infinity |
| ORF82  | ODV-E25   | Structural       |          | 1.01E+08 | 8.71E+08 | 0.066              | 0.863  | < 0.0001    | 13.08    |
| ORF69  | HA69      | Structural       | L        | 1.07E+08 | 2.91E+08 | 0.115              | 0.497  | 0.00140351  | 4.32     |
| ORF53  | FP25K     | Structural       | L        | 0.00E+00 | 3.99E+08 | 0                  | 0.486  | < 0.0001    | Infinity |
| ORF78  | VP39      | Structural       |          | 4.88E+08 | 3.64E+08 | 0.4                | 0.473  | 0.29537     | 1.18     |
| ORF106 | ODV-E18   | Auxiliary/Struct |          | 1.28E+08 | 3.82E+08 | 0.127              | 0.472  | < 0.0001    | 3.72     |
| ORF133 | HA133     | Structural       | L,E      | 4.42E+08 | 3.84E+08 | 0.371              | 0.469  | 0.13936     | 1.26     |
| ORF91  | HA91      | Structural       | E,L      | 1.20E+08 | 3.44E+08 | 0.107              | 0.451  | < 0.0001    | 4.21     |
| ORF1   | POLH      | Structural       | L        | 1.55E+08 | 3.75E+08 | 0.122              | 0.401  | < 0.0001    | 3.29     |
| ORF26  | HA26      | Structural       |          | 1.38E+08 | 2.27E+08 | 0.105              | 0.283  | < 0.0001    | 2.7      |
| ORF113 | FGF       | Auxiliary        | E        | 2.47E+09 | 2.30E+08 | 1.894              | 0.256  | 0.00181913  | 0.14     |
| ORF100 | HA100     | Structural       |          | 4.97E+07 | 1.75E+08 | 0.026              | 0.237  | < 0.0001    | 9.12     |
| ORF118 | P24       | Structural       | L        | 0.00E+00 | 2.26E+08 | 0                  | 0.23   | 0.000107157 | Infinity |
| ORF44  | HA44      | Structural       | L        | 1.19E+08 | 1.76E+08 | 0.098              | 0.216  | 0.000187616 | 2.2      |
| ORF31  | 39K/PP31  |                  |          | 0.00E+00 | 1.58E+08 | 0                  | 0.214  | < 0.0001    | Infinity |

|          |           |                  |   |          |          |        |        |             |          |
|----------|-----------|------------------|---|----------|----------|--------|--------|-------------|----------|
| ORF9     | P49       | Structural       | L | 6.16E+07 | 1.41E+08 | 0.059  | 0.214  | 0.000127974 | 3.63     |
| ORF24    | LEF-6     | Structural       |   | 0.00E+00 | 1.38E+08 | 0      | 0.206  | < 0.0001    | Infinity |
| ORF81    | HA81      |                  | L | 8.36E+07 | 1.41E+08 | 0.077  | 0.194  | 0.000948731 | 2.52     |
| ORF27    | HA27      |                  | E | 9.11E+07 | 1.21E+08 | 0.07   | 0.177  | 0.00134674  | 2.53     |
| ORF75    | HA75      |                  | E | 1.55E+08 | 1.56E+08 | 0.124  | 0.176  | 0.543726    | 1.42     |
| ORF94    | HA94      | Structural       |   | 0.00E+00 | 1.37E+08 | 0      | 0.158  | < 0.0001    | Infinity |
| ORF130   | PKIP-1    | Structural       |   | 1.38E+08 | 1.35E+08 | 0.116  | 0.147  | 0.206599    | 1.27     |
| ORF65    | LEF-3     | Structural /Repl |   | 0.00E+00 | 1.19E+08 | 0      | 0.142  | < 0.0001    | Infinity |
| ORF28    | ubiquitin | Structural       | L | 4.93E+07 | 5.88E+07 | 0.033  | 0.115  | 0.0284037   | 3.48     |
| ORF36    | HA36      |                  | E | 5.00E+07 | 7.07E+07 | 0.043  | 0.098  | 0.047305    | 2.28     |
| ORF73    | GP41      | Structural       | L | 5.82E+07 | 6.43E+07 | 0.054  | 0.082  | 0.00352955  | 1.52     |
| ORF96    | ODV-E66   | Structural       | L | 0.00E+00 | 4.12E+07 | 0      | 0.055  | < 0.0001    | Infinity |
| ORF13    | HA13      |                  |   | 0.00E+00 | 2.64E+07 | 0      | 0.037  | 0.00224754  | Infinity |
| ORF58    | GP37      | Structural       | E | 0.00E+00 | 5.27E+07 | 0      | 0.033  | 0.0104187   | Infinity |
| ORF3     | VP80      |                  |   | 0.00E+00 | 2.98E+07 | 0      | 0.027  | 0.0166779   | Infinity |
| ORF128   | HA128     | Structural       |   | 0.00E+00 | 4.55E+07 | 0      | 0.025  | 0.00878269  | Infinity |
| ORF84    | helicase  | Structural /Repl |   | 0.00E+00 | 5.08E+07 | 0      | 0.022  | 0.00818922  | Infinity |
| ORF66    | HA66      | Structural       | L | 0.00E+00 | 2.42E+07 | 0      | 0.021  | 0.00630817  | Infinity |
| ORF61    | HE65      |                  | E | 0.00E+00 | 1.83E+07 | 0      | 0.021  | 0.00870314  | Infinity |
| ORF16-17 | ME53      | Structural /Repl | E | 4.28E+07 | 0.00E+00 | 0.016  | 0      | 0.0215562   | 0        |
| ORF121   | HA121     |                  | E | 3.49E+07 | 0.00E+00 | 0.015  | 0      | 0.0118542   | 0        |
| Sum      |           |                  |   | 7.20E+10 | 7.60E+10 | 61.623 | 86.058 |             |          |

### Identified proteins encoded by baculovirus in 72hM samples

| ORF   | Protein   | Area     | Relative abundance |
|-------|-----------|----------|--------------------|
| ORF56 | cathepsin | 4.67E+07 | 0.247              |
| ORF22 | P26       | 1.23E+09 | 10.9778            |

ORF126 EGT

4.68E+08

3.441

---
