# Supplementary material for: Inhibition of melanization by serpin-5 and serpin-9 promotes baculovirus infection in cotton bollworm Helicoverpa armigera
Source: PubMed Central journal article supplement (PMC5633200; doi:10.1371/journal.ppat.1006645), 2017-09-27
Supplement: ppat.1006645.s010.pdf [file ppat.1006645.s010.pdf]

### Supplementary Data 3. A whole list of differential proteins

| Assembly No.     | Description                            | 48hM     | 48hI     | 72hM     | 72hI     | 48hI/48hM | 48hI/48hM Ttes | 72hI/72hM | 72hI/72hM Tte |
|------------------|----------------------------------------|----------|----------|----------|----------|-----------|----------------|-----------|---------------|
| comp82973_c0_seq | arylphorin precursor                   | 45.54445 | 47.22222 | 1926.667 | 94.66666 | 1.037     | 0.622          | 0.049     | < 0.0001      |
| comp82973_c0_seq | arylphorin precursor                   | 30.96667 | 40.61111 | 1514.444 | 108.2    | 1.311     | 0.002          | 0.071     | < 0.0001      |
| comp82973_c0_seq | arylphorin precursor                   | 14.55889 | 24.55556 | 802.5555 | 51.2     | 1.687     | 0.003          | 0.064     | < 0.0001      |
| comp83115_c0_seq | larval serum protein 2                 | 0.182678 | 0.254689 | 455.3333 | 0.926489 | 1.394     | 0.282          | 0.002     | < 0.0001      |
| comp78480_c0_seq | juvenile hormone binding protein       | 57.64444 | 64.73334 | 392.8889 | 35.05556 | 1.123     | 0.586          | 0.089     | < 0.0001      |
| comp83924_c1_seq | methionine-rich storage protein        | 0.050461 | 0.036067 | 319.5555 | 0.240445 | 0.715     | 0.519          | 0.001     | < 0.0001      |
| comp91639_c0_seq | apolipophorin precursor protein        | 85.94444 | 88.23333 | 318.2222 | 113.3    | 1.027     | 0.782          | 0.356     | < 0.0001      |
| comp91683_c0_seq | imaginal disc growth factor            | 76.23334 | 103.9444 | 262      | 25.16667 | 1.364     | 0.174          | 0.096     | < 0.0001      |
| comp90179_c0_seq | vitellogenin                           | 8.728889 | 82.1     | 248.9111 | 163.8667 | 9.406     | < 0.0001       | 0.658     | 0.075         |
| comp90255_c0_seq | vitellogenin                           | 7.643333 | 45.55556 | 199.9111 | 80.21111 | 5.960     | < 0.0001       | 0.401     | 0.003         |
| comp87291_c1_seq | adhesion-like transmembrane prote      | 56.98889 | 74.71111 | 192.1111 | 13.49222 | 1.311     | 0.062          | 0.070     | < 0.0001      |
| comp88772_c0_seq | moderately methionine rich storage     | 0        | 0        | 174.5556 | 0.066469 |           |                | 0.000     | < 0.0001      |
| comp85106_c1_seq | af361483_1chymotrypsin inhibitor c     | 56.27778 | 77.68889 | 146.2111 | 27.83333 | 1.380     | 0.048          | 0.190     | < 0.0001      |
| comp85106_c1_seq | serpin 1                               | 56.27778 | 77.68889 | 146.2111 | 27.83333 | 1.380     | 0.048          | 0.190     | < 0.0001      |
| comp73586_c0_seq | moderately methionine rich storage     | 0        | 0        | 130.2111 | 0.094926 |           |                | 0.001     | < 0.0001      |
| comp82850_c0_seq | vitellogenin                           | 3.061111 | 7.777778 | 122.8667 | 7.762222 | 2.541     | < 0.0001       | 0.063     | < 0.0001      |
| comp90171_c0_seq | vitellogenin                           | 10.69222 | 158.4444 | 117.5667 | 260.8889 | 14.819    | < 0.0001       | 2.219     | < 0.0001      |
| comp73970_c0_seq | moderately methionine rich storage     | 0        | 0        | 106.5333 | 0        |           |                | 0.000     | < 0.0001      |
| comp82184_c0_seq | cationic peptide cp8 precursor         | 22.09556 | 32.25555 | 76.96667 | 21.90444 | 1.460     | 0.119          | 0.285     | 0.008         |
| comp88138_c0_seq | serine protease                        | 2.387111 | 4.571111 | 50.6     | 0.819667 | 1.915     | 0.058          | 0.016     | < 0.0001      |
| comp84081_c0_seq | 27 kda hemolymph protein               | 25.25767 | 51.55555 | 50.57778 | 44.93333 | 2.041     | 0.003          | 0.888     | 0.468         |
| comp71771_c0_seq | vitellogenin                           | 1.135556 | 2.625556 | 47.57778 | 2.214444 | 2.312     | 0.071          | 0.047     | 0.004         |
| comp80209_c0_seq | scolexin b                             | 10.10389 | 4.106667 | 32.4     | 0.824778 | 0.406     | 0.008          | 0.025     | < 0.0001      |
| comp81850_c0_seq | rna-binding protein 39                 | 0        | 0        | 30.76667 | 0.399    |           |                | 0.013     | 0.011         |
| comp87712_c1_seq | vitellogenin                           | 0.541856 | 1.400333 | 26.07556 | 1.544889 | 2.584     | 0.004          | 0.059     | 0.004         |
| comp86980_c1_seq | isoform a                              | 10.01667 | 11.11444 | 22.95555 | 2.8      | 1.110     | 0.652          | 0.122     | < 0.0001      |
| comp80724_c0_seq | juvenile hormone binding protein       | 5.103611 | 8.992222 | 20.24444 | 5.167778 | 1.762     | 0.010          | 0.255     | < 0.0001      |
| comp86980_c0_seq | isoform a                              | 7.6      | 8.741111 | 19.47667 | 2.577778 | 1.150     | 0.358          | 0.132     | 0.001         |
| comp79980_c0_seq | odorant-binding protein                | 11.63    | 12.92111 | 19.07667 | 2.862222 | 1.111     | 0.696          | 0.150     | < 0.0001      |
| comp88521_c1_seq | transferrin                            | 4.804444 | 12.29333 | 18.83333 | 7.611111 | 2.559     | 0.024          | 0.404     | < 0.0001      |
| comp85253_c0_seq | inter-alpha-trypsin inhibitor heavy cf | 5.267778 | 10.96    | 18.44444 | 2.612222 | 2.081     | 0.002          | 0.142     | < 0.0001      |

|                                                        |          |          |          |          |          |          |       |          |
|--------------------------------------------------------|----------|----------|----------|----------|----------|----------|-------|----------|
| comp80301_c0_seq vitellogenin                          | 3.746667 | 42.24445 | 18.28889 | 56.47778 | 11.275   | < 0.0001 | 3.088 | < 0.0001 |
| comp82224_c0_seq mdl1                                  | 10.85222 | 13.31778 | 17.78556 | 6.433333 | 1.227    | 0.221    | 0.362 | 0.001    |
| comp80997_c0_seq PREDICTED: uncharacterized prot       | 6.654445 | 8.028889 | 16.43333 | 4.514444 | 1.207    | 0.295    | 0.275 | < 0.0001 |
| comp81655_c0_seq odorant-binding protein               | 15.43    | 15.39778 | 15.83333 | 5.004445 | 0.998    | 0.990    | 0.316 | 0.000    |
| comp90100_c0_seq low quality protein: hemicentin-1     | 6.902222 | 5.96     | 15.04667 | 2.103333 | 0.863    | 0.492    | 0.140 | < 0.0001 |
| comp89974_c0_seq low quality protein: neuroglian-like  | 8.833333 | 8.991111 | 14.84    | 2.312222 | 1.018    | 0.929    | 0.156 | < 0.0001 |
| comp84532_c0_seq hypothetical protein KGM_13324        | 4.750778 | 5.426667 | 12.10444 | 1.423333 | 1.142    | 0.424    | 0.118 | < 0.0001 |
| comp85218_c0_seq imp dehydrogenase gmp reductase       | 1.152    | 5.542222 | 12.03333 | 1.479889 | 4.811    | 0.000    | 0.123 | < 0.0001 |
| comp77695_c0_seq MBF2                                  | 3.661889 | 8.624445 | 11.00333 | 1.621667 | 2.355    | 0.001    | 0.147 | < 0.0001 |
| comp86474_c0_seq beta- -glucan recognition protein 2   | 2.901889 | 2.376667 | 10.86111 | 1.055556 | 0.819    | 0.395    | 0.097 | < 0.0001 |
| comp79150_c0_seq REPAT31                               | 6.683333 | 7.414444 | 10.77889 | 2.485556 | 1.109    | 0.609    | 0.231 | 0.000    |
| comp71102_c0_seq REPAT32                               | 4.649    | 5.646667 | 10.74555 | 2.173333 | 1.215    | 0.205    | 0.202 | 0.000    |
| comp88174_c0_seq seminal fluid protein hacp058         | 0        | 0        | 9.988889 | 0        |          |          | 0.000 | 0.004    |
| comp86024_c0_seq serine protease inhibitor 5           | 3.555556 | 2.176667 | 9.974444 | 0.684222 | 0.612    | 0.170    | 0.069 | < 0.0001 |
| comp83709_c0_seq c-type lectin                         | 1.483167 | 0.545333 | 9.853333 | 1.604445 | 0.368    | 0.004    | 0.163 | < 0.0001 |
| comp88113_c0_seq growth blocking peptide binding pro   | 3.778889 | 0.897444 | 9.762222 | 2.15     | 0.237    | < 0.0001 | 0.220 | 0.001    |
| comp88113_c0_seq growth blocking peptide binding pro   | 3.723333 | 0.897444 | 9.762222 | 2.143889 | 0.241    | < 0.0001 | 0.220 | 0.001    |
| comp89077_c0_seq prophenoxidase subunit 2              | 10.43556 | 0.739111 | 9.503333 | 4.037778 | 0.071    | < 0.0001 | 0.425 | 0.001    |
| comp1652969_c0_s seminal fluid protein hacp037         | 0.890445 | 0.695222 | 9.398889 | 0        | 0.781    | 0.667    | 0.000 | 0.006    |
| comp88680_c0_seq prophenoxidase activating factor      | 1.3251   | 1.857778 | 9.383333 | 2.292222 | 1.402    | 0.195    | 0.244 | < 0.0001 |
| comp82961_c0_seq serpin 1                              | 3.323333 | 3.196667 | 8.83     | 2.905555 | 0.962    | 0.742    | 0.329 | 0.002    |
| comp86039_c0_seq vitellogenin                          | 1.102667 | 2.828889 | 8.777778 | 2.212222 | 2.565    | < 0.0001 | 0.252 | < 0.0001 |
| comp87656_c1_seq protein cueball-like                  | 1.920222 | 2.928889 | 8.701111 | 2.687778 | 1.525    | 0.178    | 0.309 | 0.000    |
| comp88491_c0_seq prophenoxidase subunit 1              | 7        | 0.737111 | 7.587778 | 3.004444 | 0.105    | < 0.0001 | 0.396 | 0.002    |
| comp80862_c0_seq imp dehydrogenase gmp reductase       | 2.739189 | 0.308444 | 7.552222 | 0.081711 | 0.113    | < 0.0001 | 0.011 | < 0.0001 |
| comp80466_c0_seq cysteine proteinase inhibitor precur: | 4.883333 | 4.95     | 7.538889 | 2.844445 | 1.014    | 0.957    | 0.377 | 0.001    |
| comp82330_c0_seq carboxylesterase                      | 2.751111 | 2.571111 | 7.477778 | 0.810778 | 0.935    | 0.739    | 0.108 | 0.000    |
| comp80619_c0_seq ly-6 neurotoxin superfamily membe     | 3.718667 | 0.962    | 7.231111 | 0.763889 | 0.259    | 0.001    | 0.106 | 0.000    |
| comp89153_c0_seq tpa: transposase domain-containing    | 0.704144 | 2.367    | 6.991111 | 3.264444 | 3.362    | 0.007    | 0.467 | 0.109    |
| comp86871_c1_seq serpin b3-like                        | 3.385556 | 2.997778 | 6.971111 | 3.108889 | 0.885    | 0.153    | 0.446 | 0.010    |
| comp88492_c0_seq uncharacterized protein LOC77848:     | 0.439889 | 1.591    | 6.725555 | 0.309556 | 3.617    | 0.009    | 0.046 | < 0.0001 |
| comp90400_c0_seq amine oxidase                         | 0        | 2.06     | 6.702222 | 0        | Infinity | < 0.0001 | 0.000 | 0.006    |
| comp84179_c0_seq alkaline phosphatase                  | 0.213444 | 0.146778 | 6.574    | 0        | 0.688    | 0.412    | 0.000 | 0.021    |
| comp90133_c0_seq serine protease inhibitor             | 2.595556 | 1.732222 | 6.451111 | 1.107333 | 0.667    | 0.014    | 0.172 | < 0.0001 |

|                                                          |          |          |          |          |       |          |       |          |
|----------------------------------------------------------|----------|----------|----------|----------|-------|----------|-------|----------|
| comp88651_c0_seq glucose-1-phosphatase inositol pho      | 3.182555 | 4.051111 | 6.25     | 1.402778 | 1.273 | 0.254    | 0.224 | 0.003    |
| comp88113_c0_seq paralytic peptide binding protein 2     | 2.23     | 0.541222 | 6.071111 | 0.513444 | 0.243 | < 0.0001 | 0.085 | 0.002    |
| comp85451_c0_seq serine protease                         | 3.284556 | 0.854889 | 6.036666 | 0.2679   | 0.260 | < 0.0001 | 0.044 | 0.001    |
| comp81880_c1_seq odorant-binding protein                 | 4.517    | 4.168889 | 6.033333 | 0.324222 | 0.923 | 0.836    | 0.054 | 0.001    |
| comp91253_c0_seq myosin isoform c                        | 0.5438   | 0.355778 | 5.77     | 0.797222 | 0.654 | 0.232    | 0.138 | < 0.0001 |
| comp81880_c1_seq odorant-binding protein                 | 3.235556 | 2.283333 | 5.453333 | 0.272889 | 0.706 | 0.048    | 0.050 | 0.001    |
| comp90792_c1_seq carboxypeptidase d-like                 | 0        | 0        | 5.447778 | 0        |       |          | 0.000 | 0.007    |
| comp89413_c0_seq flotillin- isoform a                    | 2.297333 | 2        | 5.328889 | 0.170144 | 0.871 | 0.486    | 0.032 | 0.002    |
| comp87363_c0_seq tetraspanin e118                        | 2.35     | 0.857667 | 5.305555 | 0.89     | 0.365 | 0.002    | 0.168 | 0.006    |
| comp81880_c1_seq odorant-binding protein                 | 4.689889 | 2.943111 | 5.248889 | 0        | 0.628 | 0.339    | 0.000 | 0.002    |
| comp85242_c0_seq c-type lectin                           | 1.510733 | 0.408889 | 5.133333 | 0.339    | 0.271 | 0.001    | 0.066 | < 0.0001 |
| comp86608_c0_seq abc transporter                         | 2.867    | 0.664333 | 4.882222 | 0.551444 | 0.232 | 0.000    | 0.113 | 0.001    |
| comp77265_c0_seq mdl2                                    | 4.299667 | 5.94     | 4.841111 | 0.787444 | 1.382 | 0.118    | 0.163 | 0.009    |
| comp86525_c0_seq ly-6 neurotoxin superfamily membe       | 1.642333 | 0.604    | 4.476666 | 0.406    | 0.368 | 0.006    | 0.091 | 0.011    |
| comp89216_c0_seq juvenile hormone esterase               | 0.3643   | 0        | 4.418889 | 0        | 0.000 | < 0.0001 | 0.000 | < 0.0001 |
| comp76631_c0_seq heat shock protein                      | 0.910922 | 1.799889 | 4.402222 | 0.981889 | 1.976 | 0.041    | 0.223 | < 0.0001 |
| comp84530_c0_seq carboxylesterase 3                      | 1.694444 | 0.676778 | 4.17     | 0.332556 | 0.399 | < 0.0001 | 0.080 | < 0.0001 |
| comp85107_c0_seq adhesion related transmembrane          | 1.925778 | 0.421667 | 4.142222 | 0.046767 | 0.219 | 0.002    | 0.011 | < 0.0001 |
| comp80381_c0_seq proline-rich extensin-like protein epi  | 0.537644 | 4.850222 | 4        | 0.068344 | 9.021 | 0.077    | 0.017 | 0.022    |
| comp88300_c0_seq fat- isoform a                          | 1.804444 | 1.128889 | 3.932222 | 0.055111 | 0.626 | 0.059    | 0.014 | 0.015    |
| comp86618_c0_seq nimrod b2                               | 2.607889 | 3.094666 | 3.898889 | 0.542111 | 1.187 | 0.697    | 0.139 | 0.038    |
| comp87712_c0_seq vitellogenin                            | 0.551222 | 1.585111 | 3.84     | 1.92     | 2.876 | 0.017    | 0.500 | 0.006    |
| comp84808_c0_seq copper-zinc superoxide dismutase        | 0.689889 | 1.004778 | 3.813333 | 2.966667 | 1.456 | 0.008    | 0.778 | 0.142    |
| comp87025_c0_seq ommochrome binding protein 2            | 0.952222 | 2.063333 | 3.735556 | 0.273333 | 2.167 | 0.048    | 0.073 | < 0.0001 |
| comp82509_c0_seq follicular epithelium yolk protein sub  | 2.784967 | 2.312222 | 3.641111 | 0.617111 | 0.830 | 0.424    | 0.169 | 0.001    |
| comp84605_c0_seq unknown                                 | 2.167778 | 0.906111 | 3.618889 | 0.572556 | 0.418 | 0.005    | 0.158 | 0.000    |
| comp83380_c4_seq elongation factor 1 alpha               | 0.993333 | 1.145778 | 3.487778 | 1.717778 | 1.153 | 0.385    | 0.493 | 0.006    |
| comp87656_c1_seq low quality protein: protein cueball-li | 1.587    | 1.372222 | 3.447778 | 0.844    | 0.865 | 0.487    | 0.245 | 0.007    |
| comp82925_c0_seq vitellogenin                            | 1.034556 | 0.977    | 3.444656 | 0.9936   | 0.944 | 0.744    | 0.288 | 0.011    |
| comp85861_c0_seq gamma-interferon-inducible lysosor      | 2.321911 | 1.309556 | 3.261111 | 0.310878 | 0.564 | 0.048    | 0.095 | 0.068    |
| comp89699_c0_seq counting factor associated protein c    | 0.239644 | 0        | 3.258889 | 0        | 0.000 | 0.011    | 0.000 | 0.010    |
| comp91604_c0_seq isoform b                               | 2.226667 | 0.174111 | 3.242556 | 0.389556 | 0.078 | 0.000    | 0.120 | 0.077    |
| comp84067_c0_seq odorant-binding protein                 | 1.677667 | 3.637778 | 3.074556 | 7.062222 | 2.168 | 0.006    | 2.297 | 0.025    |
| comp89651_c0_seq fumarate mitochondrial                  | 1.433222 | 0.231333 | 3.005556 | 0.250533 | 0.161 | < 0.0001 | 0.083 | 0.000    |

|                                                         |          |          |          |          |          |          |       |          |
|---------------------------------------------------------|----------|----------|----------|----------|----------|----------|-------|----------|
| comp88277_c0_seq kinesin heavy chain                    | 0        | 0.063456 | 2.893556 | 0.011052 | Infinity | 0.028    | 0.004 | 0.038    |
| comp79036_c0_seq apolipoprotein d-like                  | 1.502889 | 4.802222 | 2.868889 | 0.992778 | 3.195    | < 0.0001 | 0.346 | 0.003    |
| comp89939_c0_seq beta-galactosidase-like                | 1.808889 | 2.657778 | 2.847778 | 1.449667 | 1.469    | 0.002    | 0.509 | 0.008    |
| comp81960_c0_seq pyrimidine-specific ribonucleoside h   | 0.787994 | 0.902889 | 2.808889 | 0.238556 | 1.146    | 0.563    | 0.085 | < 0.0001 |
| comp87697_c0_seq ferritin light chain                   | 1.267533 | 6.384444 | 2.801667 | 10.71222 | 5.037    | < 0.0001 | 3.824 | < 0.0001 |
| comp89030_c0_seq serine proteinase stubble              | 0.259342 | 0.283444 | 2.696889 | 0.181933 | 1.093    | 0.761    | 0.067 | 0.001    |
| comp85418_c0_seq ester hydrolase c11orf54 homolog       | 0.626844 | 1.390556 | 2.665222 | 0.908889 | 2.218    | 0.045    | 0.341 | 0.002    |
| comp83539_c0_seq ejaculatory bulb-specific protein 3-li | 0.7829   | 1.388444 | 2.627778 | 0.488511 | 1.773    | 0.037    | 0.186 | < 0.0001 |
| comp81495_c0_seq actin                                  | 2.69     | 0.870222 | 2.612222 | 2.017778 | 0.324    | 0.014    | 0.772 | 0.177    |
| comp61969_c1_seq sparac                                 | 1.903333 | 0.039856 | 2.595111 | 0        | 0.021    | < 0.0001 | 0.000 | 0.122    |
| comp82636_c0_seq plexin isoform a                       | 0.948222 | 0.146467 | 2.537778 | 0.131111 | 0.154    | < 0.0001 | 0.052 | < 0.0001 |
| comp61899_c0_seq c-type lectin                          | 0.160711 | 0.051756 | 2.532222 | 0        | 0.322    | 0.005    | 0.000 | < 0.0001 |
| comp76955_c0_seq nadh:ubiquinone oxidoreductase cc      | 1.263444 | 1.392444 | 2.522222 | 1.137889 | 1.102    | 0.703    | 0.451 | 0.005    |
| comp87602_c0_seq poly -specific endoribonuclease hor    | 1.437444 | 0.613444 | 2.513333 | 0.014017 | 0.427    | 0.002    | 0.006 | < 0.0001 |
| comp88228_c0_seq arrestin domain containing 4           | 1.698378 | 0.436444 | 2.425555 | 0.308778 | 0.257    | 0.001    | 0.127 | 0.000    |
| comp83305_c0_seq serine protease inhibitor 010          | 1.442656 | 1.309889 | 2.42     | 0.172956 | 0.908    | 0.651    | 0.071 | 0.000    |
| comp89275_c0_seq integrator complex subunit 5           | 0.460445 | 0.560333 | 2.382222 | 0.622556 | 1.217    | 0.627    | 0.261 | 0.038    |
| comp81880_c0_seq odorant-binding protein                | 2.028478 | 0.331667 | 2.379    | 0        | 0.164    | < 0.0001 | 0.000 | 0.158    |
| comp90452_c0_seq dystroglycan-like isoform x4           | 0.527778 | 0.054933 | 2.31     | 0.039756 | 0.104    | < 0.0001 | 0.017 | < 0.0001 |
| comp80284_c0_seq lysozyme                               | 2.868    | 3.954444 | 2.290111 | 0.569778 | 1.379    | 0.518    | 0.249 | 0.024    |
| comp87785_c0_seq apolipoprotein d                       | 0.410856 | 1.444111 | 2.218445 | 0.742556 | 3.515    | 0.000    | 0.335 | 0.001    |
| comp84866_c1_seq dimethylaniline monooxygenase          | 0.885556 | 0.655889 | 2.155555 | 0.211622 | 0.741    | 0.286    | 0.098 | < 0.0001 |
| comp85169_c0_seq lachesin                               | 1.242689 | 1.32     | 2.143333 | 0.668    | 1.062    | 0.837    | 0.312 | 0.000    |
| comp88820_c1_seq innexin 3                              | 0.547989 | 0.110178 | 2.127778 | 0.0754   | 0.201    | 0.001    | 0.035 | < 0.0001 |
| comp74915_c0_seq cathepsin d                            | 0.245889 | 0.716222 | 2.056    | 0.1203   | 2.913    | < 0.0001 | 0.059 | 0.000    |
| comp88497_c0_seq beaten path iia                        | 0.992489 | 0.170689 | 2.006667 | 0.086033 | 0.172    | 0.001    | 0.043 | < 0.0001 |
| comp91206_c0_seq integrin alpha-ps2-like                | 0.367444 | 0.301333 | 1.967444 | 0.097667 | 0.820    | 0.388    | 0.050 | 0.000    |
| comp87279_c0_seq dipeptidase 1-like                     | 0.931111 | 0.902333 | 1.948889 | 0.190111 | 0.969    | 0.860    | 0.098 | < 0.0001 |
| comp89209_c1_seq PREDICTED: uncharacterized prote       | 1.313556 | 0.658778 | 1.901111 | 0.884556 | 0.502    | < 0.0001 | 0.465 | 0.001    |
| comp79205_c0_seq unknown secreted protein               | 1.085922 | 0.744622 | 1.900111 | 0.079544 | 0.686    | 0.206    | 0.042 | < 0.0001 |
| comp91641_c0_seq apolipoporphins-like isoform x2        | 0.677556 | 0.932778 | 1.873333 | 0.335667 | 1.377    | 0.007    | 0.179 | < 0.0001 |
| comp78334_c1_seq c-type lectin                          | 0.361089 | 0.160444 | 1.862222 | 0        | 0.444    | 0.020    | 0.000 | < 0.0001 |
| comp82165_c0_seq niemann-pick type c-2a                 | 0.031876 | 0.150444 | 1.776889 | 0        | 4.720    | < 0.0001 | 0.000 | < 0.0001 |
| comp87223_c1_seq pickpocket protein 28-like             | 1.015889 | 0.269778 | 1.737222 | 0.175889 | 0.266    | < 0.0001 | 0.101 | < 0.0001 |

|                                                        |          |          |          |          |          |          |       |          |
|--------------------------------------------------------|----------|----------|----------|----------|----------|----------|-------|----------|
| comp91165_c0_seq integrin beta-ps-like                 | 0.488667 | 0.699667 | 1.714667 | 0.423111 | 1.432    | 0.193    | 0.247 | < 0.0001 |
| comp83793_c0_seq atp-dependent -nad h-hydrate dehy     | 0.148846 | 0.300111 | 1.675678 | 0.0457   | 2.016    | 0.001    | 0.027 | 0.183    |
| comp86273_c0_seq prophenol oxidase activating enzyrr   | 0.57     | 0.397    | 1.666667 | 0.113289 | 0.696    | 0.005    | 0.068 | < 0.0001 |
| comp86890_c0_seq yellow-fa precursor                   | 1.086333 | 0.980889 | 1.663889 | 0.401778 | 0.903    | 0.541    | 0.241 | 0.002    |
| comp87258_c0_seq venom serine carboxypeptidase-like    | 1.148667 | 2.072222 | 1.641111 | 0.841556 | 1.804    | < 0.0001 | 0.513 | 0.008    |
| comp81572_c0_seq innexin 2                             | 0.412956 | 0.0956   | 1.616222 | 0        | 0.232    | 0.002    | 0.000 | 0.001    |
| comp78735_c0_seq bombyrin precursor                    | 0.845    | 3.908889 | 1.610333 | 1.518889 | 4.626    | < 0.0001 | 0.943 | 0.821    |
| comp88454_c0_seq paralytic peptide binding protein 2   | 0.469    | 0.082633 | 1.577333 | 0.081778 | 0.176    | < 0.0001 | 0.052 | 0.001    |
| comp87139_c0_seq nadph:quinone reductase               | 0.546222 | 0.571111 | 1.567    | 0.259778 | 1.046    | 0.865    | 0.166 | 0.000    |
| comp86896_c0_seq protein cepu-1                        | 0.849178 | 0.538889 | 1.539    | 0.251456 | 0.635    | 0.094    | 0.163 | < 0.0001 |
| comp83540_c0_seq galectin 8                            | 0.413967 | 0.128811 | 1.493556 | 0.1862   | 0.311    | 0.002    | 0.125 | < 0.0001 |
| comp79804_c0_seq secreted peptide 30                   | 0.380011 | 0.337333 | 1.488444 | 0        | 0.888    | 0.689    | 0.000 | < 0.0001 |
| comp83865_c0_seq ommochrome binding protein 1          | 0.828    | 0.286222 | 1.446667 | 0        | 0.346    | 0.007    | 0.000 | < 0.0001 |
| comp88410_c0_seq mitochondrial ribonuclease p proteii  | 0        | 0        | 1.407778 | 0        |          |          | 0.000 | 0.048    |
| comp89403_c0_seq dna mismatch repair protein msh2      | 0.558556 | 1.412222 | 1.392889 | 0        | 2.528    | 0.029    | 0.000 | < 0.0001 |
| comp91491_c0_seq laminin subunit alpha-like            | 1.401111 | 0.558889 | 1.365556 | 1.109444 | 0.399    | 0.000    | 0.812 | 0.168    |
| comp91070_c0_seq contactin                             | 0.311111 | 0.117578 | 1.341222 | 0.0291   | 0.378    | < 0.0001 | 0.022 | < 0.0001 |
| comp85916_c0_seq transferase hexapeptide repeat pro    | 0.672667 | 0.908778 | 1.335111 | 0.206089 | 1.351    | 0.039    | 0.154 | 0.001    |
| comp83833_c0_seq small nuclear ribonucleoprotein       | 0        | 0.401667 | 1.325444 | 0        | Infinity | 0.005    | 0.000 | 0.000    |
| comp83223_c0_seq hypothetical protein KGM_12072        | 0        | 0        | 1.320556 | 0        |          |          | 0.000 | 0.000    |
| comp84339_c0_seq ommochrome binding protein 2          | 0.544089 | 0.0622   | 1.318667 | 0        | 0.114    | 0.000    | 0.000 | < 0.0001 |
| comp79487_c0_seq c-type lectin 10                      | 0.128122 | 0.044467 | 1.312222 | 0        | 0.347    | 0.008    | 0.000 | < 0.0001 |
| comp84521_c0_seq hemolymph proteinase 8                | 0.253778 | 0.754444 | 1.279667 | 0.0735   | 2.973    | < 0.0001 | 0.057 | < 0.0001 |
| comp91584_c0_seq neurexin isoform b                    | 0.300445 | 0.094144 | 1.277556 | 0.036678 | 0.313    | < 0.0001 | 0.029 | < 0.0001 |
| comp87702_c0_seq glucose-1-phosphatase inositol pho    | 1.034889 | 0.784111 | 1.259111 | 0.157211 | 0.758    | 0.107    | 0.125 | 0.000    |
| comp80880_c0_seq adenosine deaminase related growi     | 0.527056 | 1.637556 | 1.207    | 2.396667 | 3.107    | 0.007    | 1.986 | 0.001    |
| comp82120_c0_seq af250284_109 amv109                   | 0.846267 | 0.625111 | 1.205889 | 0.256222 | 0.739    | 0.273    | 0.212 | < 0.0001 |
| comp71103_c0_seq basement membrane-specific hepa       | 1.916667 | 0.894889 | 1.18     | 1.44     | 0.467    | 0.001    | 1.220 | 0.201    |
| comp80377_c0_seq c-type lectin                         | 0.605268 | 0.699445 | 1.170667 | 0.234778 | 1.156    | 0.542    | 0.201 | < 0.0001 |
| comp79874_c0_seq beta-hexosaminidase subunit beta-l    | 0        | 0        | 1.149889 | 0.067889 |          |          | 0.059 | 0.000    |
| comp81117_c0_seq pancreatic lipase-related protein 2-l | 0.051556 | 0.07767  | 1.141678 | 0        | 1.507    | 0.326    | 0.000 | < 0.0001 |
| comp90525_c0_seq leucine-rich repeat-containing prote  | 1.049444 | 0.0858   | 1.135    | 0.137667 | 0.082    | < 0.0001 | 0.121 | 0.000    |
| comp89947_c0_seq angiotensin converting enzyme         | 1.200778 | 1.675556 | 1.104333 | 1.426667 | 1.395    | < 0.0001 | 1.292 | 0.027    |
| comp87695_c1_seq hemolymph proteinase 19               | 0.368311 | 0.334889 | 1.094111 | 0.042311 | 0.909    | 0.839    | 0.039 | < 0.0001 |

|                                                         |          |          |          |          |          |          |       |          |
|---------------------------------------------------------|----------|----------|----------|----------|----------|----------|-------|----------|
| comp81495_c0_seq actin beta subunit                     | 0.690778 | 0.335    | 1.081111 | 1.14     | 0.485    | 0.018    | 1.054 | 0.849    |
| comp88973_c0_seq alkaline tissue-nonspecific isozyme-   | 0.435756 | 0.101878 | 1.08     | 0.050411 | 0.234    | < 0.0001 | 0.047 | < 0.0001 |
| comp84512_c1_seq plasma alpha-l-fucosidase              | 0.151708 | 0.080189 | 1.036778 | 0        | 0.529    | 0.071    | 0.000 | 0.000    |
| comp87528_c1_seq laminin subunit beta-1                 | 1.213333 | 0.415333 | 1.029222 | 0.674778 | 0.342    | < 0.0001 | 0.656 | 0.024    |
| comp86229_c0_seq carboxyl choline esterase              | 0.171117 | 1.366    | 1.021556 | 0        | 7.983    | < 0.0001 | 0.000 | < 0.0001 |
| comp82713_c1_seq odorant-binding protein 16             | 0.239944 | 0.295778 | 1.020444 | 0.333778 | 1.233    | 0.363    | 0.327 | 0.000    |
| comp83370_c0_seq hypothetical protein KGM_13675         | 0.303856 | 0.521778 | 1.012222 | 0.135911 | 1.717    | 0.013    | 0.134 | 0.002    |
| comp85322_c0_seq cg13532 cg13532-pa                     | 0.624544 | 0.117267 | 0.997889 | 0.070233 | 0.188    | 0.001    | 0.070 | 0.007    |
| comp83199_c0_seq cathepsin b                            | 0.088294 | 0.111322 | 0.971667 | 0.016296 | 1.261    | 0.610    | 0.017 | 0.000    |
| comp90752_c0_seq serine protease                        | 0.423289 | 0.199444 | 0.968333 | 0.169022 | 0.471    | 0.006    | 0.175 | 0.010    |
| comp82812_c1_seq hypothetical protein TcasGA2_TC0       | 2.372555 | 7.734445 | 0.964111 | 4.442222 | 3.260    | < 0.0001 | 4.608 | < 0.0001 |
| comp81078_c0_seq spermine oxidase-like                  | 0        | 0        | 0.961    | 0        |          |          | 0.000 | 0.009    |
| comp82808_c0_seq md-2-related lipid-recognition         | 0.203956 | 0.247311 | 0.914444 | 0        | 1.213    | 0.397    | 0.000 | < 0.0001 |
| comp87582_c0_seq beta- -glucanase                       | 0.0539   | 0.066978 | 0.905    | 0.0221   | 1.243    | 0.423    | 0.024 | < 0.0001 |
| comp28051_c0_seq catalase                               | 0.390445 | 0.202556 | 0.902556 | 0.597778 | 0.519    | 0.010    | 0.662 | 0.091    |
| comp87528_c0_seq laminin beta-2 chain                   | 0.797556 | 0.324    | 0.892778 | 0.572556 | 0.406    | < 0.0001 | 0.641 | 0.027    |
| comp86750_c0_seq syndecan binding protein               | 0.8726   | 0.294556 | 0.891222 | 0.141111 | 0.338    | 0.007    | 0.158 | 0.004    |
| comp83827_c0_seq carbonic anhydrase-related protein     | 0.253    | 0.114667 | 0.870778 | 0        | 0.453    | < 0.0001 | 0.000 | < 0.0001 |
| comp81117_c0_seq pancreatic lipase-related protein 2-l  | 0        | 0.129    | 0.869667 | 0        | Infinity | 0.003    | 0.000 | 0.025    |
| comp73792_c0_seq chemosensory protein 6                 | 0.177976 | 0.105254 | 0.863111 | 0.346445 | 0.591    | 0.138    | 0.401 | 0.011    |
| comp86678_c0_seq serine protease inhibitor partial      | 0.311211 | 0.971444 | 0.859967 | 0.303222 | 3.121    | < 0.0001 | 0.353 | 0.032    |
| comp87436_c0_seq leukotriene a-4 hydrolase              | 0.382945 | 0.569667 | 0.856556 | 0.653222 | 1.488    | 0.012    | 0.763 | 0.302    |
| comp88698_c0_seq PREDICTED: uncharacterized prot        | 0.410345 | 0.099244 | 0.846222 | 0.026322 | 0.242    | 0.000    | 0.031 | < 0.0001 |
| comp82272_c0_seq c-type lectin                          | 0.189286 | 0        | 0.839389 | 0        | 0.000    | 0.001    | 0.000 | 0.001    |
| comp84724_c0_seq beta- -glucan recognition protein 2    | 0.638444 | 1.152222 | 0.837667 | 0.271667 | 1.805    | 0.003    | 0.324 | 0.000    |
| comp86718_c0_seq serine protease                        | 0.358211 | 0.697222 | 0.825    | 0.160916 | 1.946    | 0.017    | 0.195 | 0.000    |
| comp90659_c0_seq chitooligosaccharidolytic beta-n-ace   | 0.418389 | 0.1437   | 0.808    | 0        | 0.343    | 0.014    | 0.000 | 0.004    |
| comp78977_c0_seq imp dehydrogenase gmp reductase        | 0.093522 | 0.501222 | 0.784667 | 0        | 5.359    | < 0.0001 | 0.000 | < 0.0001 |
| comp84167_c0_seq beat- isoform d                        | 0.233933 | 0.248111 | 0.782333 | 0        | 1.061    | 0.761    | 0.000 | 0.001    |
| comp74161_c0_seq deoxyribonuclease i                    | 0.237333 | 0.357    | 0.771111 | 0        | 1.504    | 0.124    | 0.000 | 0.001    |
| comp82743_c0_seq lysosomal pro-x carboxypeptidase-l     | 0.134556 | 0.021544 | 0.764445 | 0        | 0.160    | 0.000    | 0.000 | 0.000    |
| comp78587_c0_seq cellular retinoic acid binding protein | 0.302922 | 0.771778 | 0.761444 | 1.433333 | 2.548    | 0.028    | 1.882 | < 0.0001 |
| comp86206_c1_seq aldo-keto reductase                    | 0.0563   | 0.138833 | 0.754889 | 0        | 2.466    | < 0.0001 | 0.000 | 0.000    |
| comp92122_c0_seq probable transcription-associated pi   | 0.166067 | 0.030567 | 0.751556 | 0        | 0.184    | 0.020    | 0.000 | 0.001    |

|                                                              |          |          |          |          |          |          |       |          |
|--------------------------------------------------------------|----------|----------|----------|----------|----------|----------|-------|----------|
| comp90171_c1_seq reverse transcriptase                       | 1.337667 | 2.116667 | 0.744667 | 0.50679  | 1.582    | 0.044    | 0.681 | 0.245    |
| comp86764_c0_seq probable atp-dependent rna helicase         | 0        | 0        | 0.721667 | 0        |          |          | 0.000 | 0.012    |
| comp86725_c0_seq methylenetetrahydrofolate dehydrogenase     | 0        | 0        | 0.712333 | 0        |          |          | 0.000 | < 0.0001 |
| comp86020_c1_seq chymotrypsin                                | 0.15986  | 0.013356 | 0.709778 | 0        | 0.084    | 0.003    | 0.000 | < 0.0001 |
| comp90740_c0_seq proactivator polypeptide                    | 0.231889 | 0.075967 | 0.708333 | 0.0741   | 0.328    | < 0.0001 | 0.105 | < 0.0001 |
| comp86727_c0_seq beat protein                                | 0.718733 | 0.149433 | 0.695445 | 0.087944 | 0.208    | 0.001    | 0.126 | 0.003    |
| comp81666_c0_seq hypothetical protein KGM_13675              | 0.073757 | 0.175222 | 0.689    | 0        | 2.376    | < 0.0001 | 0.000 | < 0.0001 |
| comp89702_c0_seq lanb2                                       | 1.208889 | 0.658667 | 0.684556 | 0.758222 | 0.545    | 0.001    | 1.108 | 0.556    |
| comp84154_c0_seq serine proteinase                           | 0.070511 | 0        | 0.674444 | 0        | 0.000    | 0.002    | 0.000 | 0.004    |
| comp87524_c1_seq peptidoglycan recognition protein           | 0.479256 | 0.545    | 0.671778 | 0.110556 | 1.137    | 0.538    | 0.165 | < 0.0001 |
| comp88597_c0_seq arylsulfatase j-like                        | 0.375067 | 0.404889 | 0.670667 | 0.228889 | 1.080    | 0.818    | 0.341 | 0.007    |
| comp89163_c0_seq lysosomal alpha-mannosidase (mannanase)     | 0.263022 | 0.222222 | 0.667333 | 0.036456 | 0.845    | 0.373    | 0.055 | < 0.0001 |
| comp84867_c0_seq adhesion related transmembrane protein      | 0.215268 | 0.310889 | 0.656778 | 0        | 1.444    | 0.086    | 0.000 | < 0.0001 |
| comp90999_c0_seq autophagy related protein atg3-like         | 0.735667 | 0.106933 | 0.656    | 0.0753   | 0.145    | < 0.0001 | 0.115 | < 0.0001 |
| comp84192_c0_seq cg14275 cg14275-pa                          | 0.221567 | 0.621778 | 0.655333 | 0.367667 | 2.806    | 0.014    | 0.561 | 0.019    |
| comp83499_c0_seq isocitrate dehydrogenase                    | 0.450111 | 0.234222 | 0.648778 | 0.169778 | 0.520    | 0.000    | 0.262 | 0.001    |
| comp87870_c0_seq alpha- partial                              | 0.150284 | 0.141311 | 0.639556 | 0.077744 | 0.940    | 0.820    | 0.122 | 0.002    |
| comp86490_c1_seq malate dehydrogenase                        | 1.52     | 0.246222 | 0.638556 | 0.261    | 0.162    | 0.000    | 0.409 | 0.011    |
| comp89416_c1_seq neutral alpha-glucosidase ab-like           | 0.453778 | 0.777445 | 0.637456 | 0.153956 | 1.713    | 0.211    | 0.242 | 0.029    |
| comp86657_c0_seq venom dipeptidyl peptidase 4-like           | 0.450778 | 0.710889 | 0.633556 | 0.398667 | 1.577    | 0.003    | 0.629 | 0.115    |
| comp83236_c0_seq aldo-keto reductase                         | 0.828467 | 1.522889 | 0.627444 | 1.017444 | 1.838    | 0.115    | 1.622 | 0.002    |
| comp82440_c0_seq ubiquitin family protein                    | 0.289956 | 0.164222 | 0.625667 | 0.201056 | 0.566    | 0.111    | 0.321 | 0.008    |
| comp88368_c0_seq ankyrin repeat domain protein               | 0        | 0.081956 | 0.622667 | 0.103111 | Infinity | 0.015    | 0.166 | 0.017    |
| comp66611_c0_seq hypothetical protein KGM_18556              | 0.640889 | 0.305222 | 0.614889 | 0.173333 | 0.476    | 0.081    | 0.282 | 0.033    |
| comp80424_c0_seq takeout jhbp like protein                   | 0.0528   | 0.096156 | 0.611445 | 0.153222 | 1.821    | 0.140    | 0.251 | < 0.0001 |
| comp83396_c1_seq hypothetical protein                        | 0.626356 | 0.159456 | 0.588445 | 0.151233 | 0.255    | 0.001    | 0.257 | < 0.0001 |
| comp70799_c0_seq 14-3-3 zeta                                 | 0.116589 | 0.198333 | 0.587556 | 0.615889 | 1.701    | 0.044    | 1.048 | 0.881    |
| comp88697_c0_seq extradiol ring-cleavage dioxygenase         | 0.139359 | 0.050956 | 0.578278 | 0        | 0.366    | 0.019    | 0.000 | 0.001    |
| comp82183_c0_seq serine protease 33                          | 0.155044 | 0        | 0.574111 | 0        | 0.000    | < 0.0001 | 0.000 | < 0.0001 |
| comp83840_c0_seq glutathione s-transferase omega-1-like      | 0.126289 | 0.073011 | 0.573333 | 0.202511 | 0.578    | 0.033    | 0.353 | 0.001    |
| comp86286_c0_seq carboxypeptidase e-like                     | 0.090878 | 0.128033 | 0.570333 | 0.048844 | 1.409    | 0.297    | 0.086 | < 0.0001 |
| comp87076_c0_seq multiple inositol polyphosphate phosphatase | 0.715722 | 0.152778 | 0.563    | 0.125178 | 0.213    | 0.001    | 0.222 | 0.010    |
| comp91245_c0_seq fibulin 1                                   | 0.536556 | 0.484111 | 0.548111 | 0.145056 | 0.902    | 0.470    | 0.265 | < 0.0001 |
| comp86868_c0_seq thrombospondin-4-like isoform x3            | 0.357    | 0.265778 | 0.547889 | 0.207    | 0.744    | 0.164    | 0.378 | 0.003    |

|                                                        |          |          |          |          |       |          |       |          |
|--------------------------------------------------------|----------|----------|----------|----------|-------|----------|-------|----------|
| comp85649_c0_seq c-type lectin 10                      | 0.105373 | 0.381889 | 0.535222 | 0        | 3.624 | 0.039    | 0.000 | < 0.0001 |
| comp87309_c0_seq phosphoglucose mutase                 | 0.297589 | 0.173667 | 0.535222 | 0.223889 | 0.584 | 0.057    | 0.418 | 0.001    |
| comp86182_c0_seq venom acid phosphatase                | 0.303833 | 0        | 0.523111 | 0        | 0.000 | < 0.0001 | 0.000 | 0.000    |
| comp78334_c0_seq c-type lectin                         | 0.231033 | 0.105611 | 0.521667 | 0        | 0.457 | 0.053    | 0.000 | 0.014    |
| comp88108_c0_seq pattern recognition serine proteinase | 0.296822 | 0.305778 | 0.511889 | 0.198778 | 1.030 | 0.888    | 0.388 | 0.005    |
| comp90660_c0_seq membrane-associated guanylate w       | 0.199122 | 0        | 0.505144 | 0        | 0.000 | 0.014    | 0.000 | 0.144    |
| comp88977_c0_seq isoform a                             | 0.228333 | 0.427111 | 0.505111 | 0.110333 | 1.871 | 0.013    | 0.218 | 0.001    |
| comp89010_c0_seq heat shock protein 90                 | 0.221556 | 0.431444 | 0.461889 | 0.929667 | 1.947 | < 0.0001 | 2.013 | 0.023    |
| comp86270_c0_seq neuroserpin isoform 2                 | 0.231544 | 0.153778 | 0.451556 | 0.123767 | 0.664 | 0.169    | 0.274 | 0.010    |
| comp88907_c1_seq o-glycosyl hydrolase family 30 prote  | 0        | 0        | 0.443333 | 0        |       |          | 0.000 | 0.049    |
| comp80295_c0_seq juvenile hormone binding protein      | 0        | 0        | 0.435333 | 0        |       |          | 0.000 | 0.007    |
| comp82218_c0_seq glutathione s-transferase             | 0.262222 | 0.404333 | 0.434111 | 1.443333 | 1.542 | 0.093    | 3.325 | < 0.0001 |
| comp80492_c0_seq protein cueball-like                  | 0.054487 | 0.204667 | 0.422778 | 0        | 3.756 | 0.000    | 0.000 | 0.013    |
| comp91219_c0_seq arylphorin subunit alpha              | 0        | 0        | 0.412333 | 0        |       |          | 0.000 | 0.001    |
| comp82833_c0_seq cg12811 cg12811-pa                    | 0.087344 | 0.205944 | 0.409333 | 0        | 2.358 | 0.073    | 0.000 | < 0.0001 |
| comp84005_c0_seq hemolymph proteinase 6                | 0.1743   | 0.167378 | 0.406311 | 0.023822 | 0.960 | 0.845    | 0.059 | 0.002    |
| comp86258_c1_seq uncharacterized oxidoreductase yrb    | 0.2445   | 0.360778 | 0.405922 | 1.369444 | 1.476 | 0.078    | 3.374 | < 0.0001 |
| comp82793_c0_seq glutathione s-transferase             | 0.191233 | 0.602    | 0.404703 | 0.607778 | 3.148 | 0.002    | 1.502 | 0.145    |
| comp84512_c0_seq plasma alpha-l-fucosidase             | 0.105238 | 0.085156 | 0.395    | 0        | 0.809 | 0.264    | 0.000 | 0.000    |
| comp88086_c0_seq beat- isoform a                       | 0.388344 | 0.063456 | 0.392767 | 0.007489 | 0.163 | < 0.0001 | 0.019 | 0.003    |
| comp87389_c0_seq aminoacylase-1-like                   | 0.250922 | 0.136567 | 0.364444 | 0.1211   | 0.544 | 0.024    | 0.332 | 0.036    |
| comp90967_c0_seq aminopeptidase n-like protein         | 0.337445 | 0.193667 | 0.362889 | 0.589667 | 0.574 | 0.006    | 1.625 | 0.039    |
| comp80492_c1_seq protein cueball-like                  | 0.056231 | 0.149867 | 0.355222 | 0        | 2.665 | 0.001    | 0.000 | < 0.0001 |
| comp80563_c0_seq plasma glutamate carboxypeptidase     | 0.156541 | 0.077233 | 0.353556 | 0.036559 | 0.493 | 0.034    | 0.103 | 0.004    |
| comp83983_c2_seq histone h2a                           | 0.02619  | 0.070822 | 0.351111 | 0.517333 | 2.704 | 0.010    | 1.473 | 0.060    |
| comp87423_c0_seq cysteine proteinase inhibitor precurs | 0.428778 | 0.082189 | 0.342456 | 0.012678 | 0.192 | 0.001    | 0.037 | 0.001    |
| comp86854_c0_seq isoform b                             | 0.148833 | 0        | 0.335556 | 0        | 0.000 | 0.004    | 0.000 | 0.015    |
| comp82573_c0_seq peroxiredoxin 1                       | 0.124122 | 0.414889 | 0.321222 | 0.788889 | 3.343 | < 0.0001 | 2.456 | < 0.0001 |
| comp90473_c0_seq unconventional myosin-ixa-like        | 0        | 0        | 0.318889 | 0        |       |          | 0.000 | 0.024    |
| comp90203_c0_seq calsyntenin-1 precursor               | 0.185389 | 0.040167 | 0.318222 | 0        | 0.217 | 0.000    | 0.000 | 0.009    |
| comp91407_c0_seq receptor tyrosine phosphatase type    | 0.0252   | 0        | 0.318167 | 0        | 0.000 | < 0.0001 | 0.000 | 0.001    |
| comp85815_c0_seq fatty acid synthase                   | 0.186667 | 0.0514   | 0.317333 | 1.576333 | 0.275 | 0.008    | 4.967 | 0.001    |
| comp84657_c0_seq serine protease 2                     | 0.018733 | 0        | 0.314    | 0        | 0.000 | 0.007    | 0.000 | < 0.0001 |
| comp82633_c0_seq PREDICTED: uncharacterized prote      | 1.044839 | 0.365556 | 0.313111 | 0.457111 | 0.350 | 0.047    | 1.460 | 0.291    |



|                                                        |          |          |          |          |          |          |       |          |
|--------------------------------------------------------|----------|----------|----------|----------|----------|----------|-------|----------|
| comp90656_c0_seq apyrase                               | 0.365978 | 0.391222 | 0.301889 | 0.063211 | 1.069    | 0.816    | 0.209 | 0.012    |
| comp83157_c1_seq purple acid phosphatase               | 0        | 0        | 0.296067 | 0        |          |          | 0.000 | 0.001    |
| comp86799_c0_seq hypothetical protein KGM_06662        | 0.412111 | 0.049322 | 0.290711 | 0        | 0.120    | < 0.0001 | 0.000 | 0.000    |
| comp86427_c0_seq palmitoyl-protein thioesterase 1      | 0.009051 | 0        | 0.277133 | 0        | 0.000    | 0.043    | 0.000 | 0.002    |
| comp85443_c0_seq superoxide dismutase                  | 0.281333 | 0.357111 | 0.272245 | 0.727222 | 1.269    | 0.241    | 2.671 | 0.001    |
| comp90259_c1_seq collagen alpha-1 chain-like           | 1.734667 | 0.057123 | 0.271667 | 0.0843   | 0.033    | < 0.0001 | 0.310 | 0.053    |
| comp28127_c0_seq profilin                              | 0.137044 | 0.217222 | 0.27     | 0.417444 | 1.585    | 0.036    | 1.546 | 0.150    |
| comp77144_c0_seq odorant-binding protein               | 0.088366 | 0.310733 | 0.259211 | 0.552978 | 3.516    | 0.000    | 2.133 | 0.099    |
| comp77886_c0_seq hmct_bommo ame: full=hemocytin        | 0.513889 | 0.046122 | 0.249056 | 0.052074 | 0.090    | 0.070    | 0.209 | 0.037    |
| comp84437_c0_seq takeout jhbp like protein             | 0        | 0.041467 | 0.242556 | 0        | Infinity | 0.001    | 0.000 | 0.010    |
| comp82847_c0_seq PREDICTED: uncharacterized prote      | 0.286044 | 0.498556 | 0.238333 | 0.106933 | 1.743    | 0.052    | 0.449 | 0.020    |
| comp93298_c0_seq bilin binding protein 1               | 0.242911 | 0.460445 | 0.235856 | 0.523667 | 1.896    | 0.067    | 2.220 | 0.015    |
| comp81818_c1_seq tubulin alpha-1 chain-like            | 0        | 0        | 0.222222 | 0        |          |          | 0.000 | 0.026    |
| comp86956_c0_seq fructose -bisphosphate aldolase       | 0        | 0.043144 | 0.221711 | 0.086167 | Infinity | 0.003    | 0.389 | 0.136    |
| comp74143_c0_seq ommochrome binding protein 2          | 0.194444 | 0.374778 | 0.216289 | 0.312444 | 1.927    | 0.006    | 1.445 | 0.202    |
| comp88391_c0_seq venom serine carboxypeptidase-like    | 0.029139 | 0        | 0.215878 | 0        | 0.000    | 0.001    | 0.000 | 0.016    |
| comp88591_c0_seq transketolase-like protein 2          | 0.259711 | 0.137333 | 0.213333 | 0.735667 | 0.529    | 0.010    | 3.448 | < 0.0001 |
| comp84057_c0_seq ecdysteroid regulated protein         | 0        | 0        | 0.211078 | 0        |          |          | 0.000 | 0.001    |
| comp91561_c0_seq isoform a                             | 0.674333 | 0.089611 | 0.210667 | 0.070756 | 0.133    | < 0.0001 | 0.336 | 0.027    |
| comp82743_c1_seq lysosomal pro-x carboxypeptidase      | 0        | 0        | 0.202778 | 0        |          |          | 0.000 | 0.007    |
| comp90203_c0_seq calsyntenin-1-like                    | 0.167922 | 0        | 0.193778 | 0        | 0.000    | < 0.0001 | 0.000 | 0.017    |
| comp69917_c0_seq neurexin domain-containing protein    | 0.404211 | 0.467222 | 0.186222 | 0.034867 | 1.156    | 0.744    | 0.187 | 0.037    |
| comp86587_c0_seq neural cell adhesion molecule 1-like  | 0.2291   | 0.114711 | 0.175111 | 0.022989 | 0.501    | 0.021    | 0.131 | 0.009    |
| comp90517_c0_seq fibrillin-2                           | 0.335111 | 0        | 0.169    | 0.025644 | 0.000    | 0.000    | 0.152 | 0.023    |
| comp86072_c0_seq s-adenosyl-l-homocysteine hydrolase   | 0.156467 | 0.1451   | 0.166667 | 0.373333 | 0.927    | 0.648    | 2.240 | 0.044    |
| comp91753_c0_seq triosephosphate isomerase             | 0.069178 | 0.195778 | 0.166478 | 0.441    | 2.830    | 0.003    | 2.649 | 0.001    |
| comp84037_c0_seq phosphatidylethanolamine-binding p    | 0.129767 | 0.219222 | 0.165333 | 0.501    | 1.689    | 0.153    | 3.030 | 0.000    |
| comp79817_c0_seq 40s ribosomal protein sa-like         | 0.076378 | 0.055844 | 0.162222 | 0.465    | 0.731    | 0.103    | 2.866 | 0.001    |
| comp88303_c0_seq transcriptional adapter 1-like        | 0.019606 | 0        | 0.161633 | 0        | 0.000    | 0.025    | 0.000 | 0.044    |
| comp85042_c0_seq ras-related protein rab-35-like       | 0.081444 | 0        | 0.148111 | 0        | 0.000    | 0.001    | 0.000 | 0.005    |
| comp88260_c0_seq PREDICTED: uncharacterized prote      | 0.065009 | 0.081367 | 0.144011 | 0        | 1.252    | 0.334    | 0.000 | 0.001    |
| comp87440_c0_seq c-1-tetrahydrofolate cytoplasmic-like | 0.095189 | 0.078767 | 0.1419   | 0.232333 | 0.827    | 0.336    | 1.637 | 0.036    |
| comp86901_c0_seq serine hydroxymethyltransferase       | 0.040709 | 0.019867 | 0.136    | 0.136158 | 0.488    | 0.020    | 1.001 | 0.998    |
| comp91427_c0_seq latrophilin cir1-like isoform 1       | 0.681222 | 0.076789 | 0.128    | 0.040133 | 0.113    | < 0.0001 | 0.314 | 0.078    |

|                                                        |          |          |          |          |          |          |          |          |
|--------------------------------------------------------|----------|----------|----------|----------|----------|----------|----------|----------|
| comp85923_c0_seq hypothetical protein KGM_03936        | 0.1276   | 0.0646   | 0.124333 | 0        | 0.506    | 0.012    | 0.000    | 0.007    |
| comp83274_c0_seq takeout jhbp like protein             | 0.090856 | 0.119078 | 0.1207   | 0.286667 | 1.311    | 0.384    | 2.375    | 0.009    |
| comp90967_c0_seq aminopeptidase n-like                 | 0.214889 | 0.143889 | 0.115778 | 0.476444 | 0.670    | 0.008    | 4.115    | < 0.0001 |
| comp71103_c0_seq low quality protein: basement membl   | 0.437778 | 0.438889 | 0.115222 | 0.778333 | 1.003    | 0.983    | 6.755    | < 0.0001 |
| comp88265_c0_seq beta-glucosidase precursor            | 0.08497  | 0        | 0.113744 | 0        | 0.000    | < 0.0001 | 0.000    | 0.123    |
| comp79271_c0_seq glutathione s-transferase 1           | 0.070822 | 0.114056 | 0.106556 | 0.450444 | 1.610    | 0.055    | 4.227    | < 0.0001 |
| comp90644_c0_seq low density lipoprotein               | 0.189556 | 0.121767 | 0.105444 | 0.245667 | 0.642    | 0.000    | 2.330    | < 0.0001 |
| comp88615_c0_seq alpha-n-acetyl glucosaminidase        | 0.335445 | 0.618556 | 0.103211 | 0.078779 | 1.844    | < 0.0001 | 0.763    | 0.706    |
| comp73258_c0_seq arginine kinase                       | 0.075211 | 0.438111 | 0.102033 | 0.367778 | 5.825    | < 0.0001 | 3.604    | < 0.0001 |
| comp85240_c0_seq serine protease                       | 0.273278 | 0.111411 | 0.091311 | 0.105778 | 0.408    | 0.008    | 1.158    | 0.705    |
| comp79814_c0_seq fatbody protein 3rev-g1               | 0.098011 | 0.148333 | 0.086578 | 0.118556 | 1.513    | 0.009    | 1.369    | 0.479    |
| comp90578_c0_seq peroxidase-like isoform 2             | 0.014828 | 0        | 0.085222 | 0        | 0.000    | < 0.0001 | 0.000    | 0.007    |
| comp87769_c0_seq probable phosphoserine aminotrans     | 0.080744 | 0.028611 | 0.080178 | 0.076511 | 0.354    | 0.002    | 0.954    | 0.917    |
| comp81656_c1_seq aldo-keto reductase                   | 0.058347 | 0.164344 | 0.078956 | 0.195556 | 2.817    | 0.012    | 2.477    | 0.014    |
| comp80008_c0_seq hmg176 isoform a                      | 0.042836 | 0.095233 | 0.077444 | 0.051    | 2.223    | < 0.0001 | 0.659    | 0.422    |
| comp81705_c0_seq hmg176 isoform c                      | 0.178867 | 0.039011 | 0.069389 | 0        | 0.218    | 0.002    | 0.000    | 0.001    |
| comp86780_c0_seq isoform a                             | 0.371333 | 0.248667 | 0.060411 | 0        | 0.670    | 0.008    | 0.000    | 0.018    |
| comp81720_c0_seq ribosomal protein s3a                 | 0.056334 | 0.100278 | 0.056533 | 0.461111 | 1.780    | 0.072    | 8.156    | < 0.0001 |
| comp81829_c0_seq bifunctional purine biosynthesis pro  | 0.08653  | 0.034233 | 0.014556 | 0.186111 | 0.396    | 0.000    | 12.786   | < 0.0001 |
| comp87029_c0_seq hrp65 protein                         | 5.288889 | 0.024778 | 0.002011 | 0.304245 | 0.005    | 0.308    | 151.282  | 0.006    |
| comp89223_c0_seq protein npc2 homolog                  | 0        | 0.109056 | 0        | 0        | Infinity | 0.018    |          |          |
| comp3229135_c0_s hypothetical protein KGM_07884        | 0        | 0        | 0        | 2.497778 |          |          | Infinity | 0.002    |
| comp78016_c0_seq calponin transgelin                   | 0        | 0.052058 | 0        | 0        | Infinity | 0.000    |          |          |
| comp72945_c0_seq protease inhibitor 1                  | 0.033444 | 0        | 0        | 0.018744 | 0.000    | 0.006    | Infinity | 0.068    |
| comp83876_c0_seq hypothetical protein KGM_12914        | 0.06979  | 0.209222 | 0        | 0.1084   | 2.998    | 0.007    | Infinity | < 0.0001 |
| comp88131_c0_seq cytosolic non-specific dipeptidase-li | 0        | 0        | 0        | 0.026847 |          |          | Infinity | 0.019    |
| comp80465_c0_seq thioredoxin-like protein              | 0.087464 | 0.092689 | 0        | 0.22108  | 1.060    | 0.848    | Infinity | 0.000    |
| comp61966_c1_seq REPAT34                               | 0.163244 | 0.305544 | 0        | 0.071333 | 1.872    | 0.122    | Infinity | 0.002    |
| comp83468_c0_seq fk506-binding protein                 | 0.052722 | 0        | 0        | 0        | 0.000    | 0.003    |          |          |
| comp84382_c0_seq cytochrome c                          | 0        | 0.0357   | 0        | 0.1043   | Infinity | 0.007    | Infinity | < 0.0001 |
| comp89480_c1_seq selenoprotein m                       | 0.119682 | 0.088089 | 0        | 0.024978 | 0.736    | 0.259    | Infinity | 0.010    |
| comp81420_c0_seq REPAT33                               | 0.065332 | 0.152411 | 0        | 0        | 2.333    | 0.017    |          |          |
| comp69720_c0_seq ribosomal protein p1                  | 0.090423 | 0.121378 | 0        | 0.311444 | 1.342    | 0.151    | Infinity | 0.001    |
| comp88444_c0_seq peroxidase-like                       | 0        | 0.029156 | 0        | 0        | Infinity | 0.001    |          |          |

|                                                          |          |          |   |          |          |          |          |          |
|----------------------------------------------------------|----------|----------|---|----------|----------|----------|----------|----------|
| comp77537_c1_seq 60s acidic ribosomal protein p2         | 0        | 0        | 0 | 0.185589 |          |          | Infinity | 0.000    |
| comp78399_c0_seq cuticular protein rr-1 motif 46         | 0        | 0.342489 | 0 | 0.099589 | Infinity | < 0.0001 | Infinity | 0.002    |
| comp85056_c2_seq ribosomal protein l30                   | 0.024856 | 0        | 0 | 0.181678 | 0.000    | < 0.0001 | Infinity | < 0.0001 |
| comp85802_c1_seq histone 3                               | 0        | 0        | 0 | 0.129333 |          |          | Infinity | 0.001    |
| comp70756_c0_seq ribosomal protein s26                   | 0.015356 | 0.058278 | 0 | 0.216711 | 3.795    | 0.048    | Infinity | < 0.0001 |
| comp78179_c0_seq macrophage migration inhibitory fac     | 0        | 0        | 0 | 0.081622 |          |          | Infinity | 0.012    |
| comp82267_c0_seq hypothetical protein KGM_01763          | 0.147898 | 0        | 0 | 0        | 0.000    | 0.000    |          |          |
| comp86752_c0_seq aldo-keto reductase                     | 0.029856 | 0        | 0 | 0        | 0.000    | 0.007    |          |          |
| comp27985_c0_seq ribosomal protein l34                   | 0        | 0.035489 | 0 | 0.080111 | Infinity | 0.038    | Infinity | 0.001    |
| comp91655_c0_seq ribosomal protein s25                   | 0.061691 | 0.121111 | 0 | 0.371889 | 1.963    | 0.000    | Infinity | < 0.0001 |
| comp81167_c0_seq hmg176 isoform a                        | 0        | 0.035278 | 0 | 0.012689 | Infinity | < 0.0001 | Infinity | 0.024    |
| comp78411_c0_seq ribosomal protein l36                   | 0        | 0        | 0 | 0.104156 |          |          | Infinity | 0.000    |
| comp81861_c0_seq low quality protein: protein cueball-li | 0        | 0        | 0 | 0.103    |          |          | Infinity | 0.011    |
| comp61873_c0_seq ribosomal protein l35                   | 0        | 0        | 0 | 0.114412 |          |          | Infinity | 0.004    |
| comp87482_c0_seq amine oxidase                           | 0.0203   | 0        | 0 | 0        | 0.000    | 0.001    |          |          |
| comp74713_c0_seq chemosensory protein partial            | 0        | 0        | 0 | 0.329    |          |          | Infinity | 0.001    |
| comp78446_c0_seq ribosomal protein l31                   | 0.022557 | 0.035033 | 0 | 0.428778 | 1.553    | 0.226    | Infinity | < 0.0001 |
| comp83626_c0_seq fatty acid binding protein              | 0        | 0.147056 | 0 | 0        | Infinity | < 0.0001 |          |          |
| comp61996_c0_seq waprin-phi1-like isoform 2              | 0.312667 | 0.322111 | 0 | 0.042933 | 1.030    | 0.879    | Infinity | 0.026    |
| comp81057_c0_seq vacuolar atp synthase subunit f         | 0        | 0.009796 | 0 | 0.027622 | Infinity | 0.019    | Infinity | 0.007    |
| comp91510_c0_seq alpha-2-macroglobulin-like protein 1    | 0.038849 | 0        | 0 | 0        | 0.000    | < 0.0001 |          |          |
| comp79515_c0_seq chemosensory protein 1 partial          | 0.221956 | 0        | 0 | 0        | 0.000    | 0.002    |          |          |
| comp84659_c0_seq tpa: cuticle protein                    | 0        | 0        | 0 | 0.136444 |          |          | Infinity | 0.030    |
| comp61773_c0_seq cg12324 protein                         | 0.039381 | 0.079922 | 0 | 0.351667 | 2.029    | 0.095    | Infinity | < 0.0001 |
| comp80274_c0_seq ribosomal protein s30                   | 0        | 0        | 0 | 0.174256 |          |          | Infinity | < 0.0001 |
| comp73243_c0_seq thymosin isoform 2                      | 0        | 0.016104 | 0 | 0        | Infinity | 0.033    |          |          |
| comp47514_c0_seq ribosomal protein s24                   | 0        | 0        | 0 | 0.1813   |          |          | Infinity | < 0.0001 |
| comp77463_c0_seq neuroglian                              | 0.064193 | 0        | 0 | 0        | 0.000    | 0.003    |          |          |
| comp78381_c0_seq ribosomal protein s17                   | 0.023301 | 0.072189 | 0 | 0.468222 | 3.098    | < 0.0001 | Infinity | < 0.0001 |
| comp69686_c0_seq ribosomal protein l27                   | 0        | 0.036733 | 0 | 0.187444 | Infinity | 0.000    | Infinity | < 0.0001 |
| comp75679_c0_seq ribosomal protein l32                   | 0        | 0        | 0 | 0.049969 |          |          | Infinity | 0.015    |
| comp82171_c0_seq fatty acid binding protein              | 0        | 0.615667 | 0 | 0.543222 | Infinity | < 0.0001 | Infinity | < 0.0001 |
| comp82171_c0_seq fatty acid binding protein              | 0        | 0.411778 | 0 | 0.647444 | Infinity | < 0.0001 | Infinity | < 0.0001 |
| comp83892_c0_seq fatty acid binding protein              | 0.010786 | 0.387    | 0 | 0.517444 | 35.881   | < 0.0001 | Infinity | < 0.0001 |

|                                                         |          |          |   |          |          |          |          |          |
|---------------------------------------------------------|----------|----------|---|----------|----------|----------|----------|----------|
| comp83660_c1_seq fatty acid-binding adipocyte-like      | 0        | 0        | 0 | 0.015367 |          |          | Infinity | 0.007    |
| comp84033_c0_seq antennal binding protein               | 0.137522 | 0.276778 | 0 | 0.327391 | 2.013    | 0.004    | Infinity | < 0.0001 |
| comp79384_c0_seq hmg176 isoform c                       | 0.071956 | 0        | 0 | 0        | 0.000    | 0.002    |          |          |
| comp81861_c0_seq hypothetical protein KGM_13045         | 0.110818 | 0.425667 | 0 | 0        | 3.841    | 0.000    |          |          |
| comp73633_c0_seq ribosomal protein s12                  | 0        | 0        | 0 | 0.197322 |          |          | Infinity | < 0.0001 |
| comp79650_c0_seq ribosomal protein l28                  | 0        | 0        | 0 | 0.137778 |          |          | Infinity | 0.001    |
| comp89409_c0_seq centrosomal protein of 290 kda-like    | 0        | 0        | 0 | 0.226656 |          |          | Infinity | 0.002    |
| comp89908_c0_seq aldehyde dehydrogenase family 7 n      | 0        | 0        | 0 | 0.039633 |          |          | Infinity | 0.029    |
| comp69454_c0_seq ribosomal protein s23                  | 0        | 0.039744 | 0 | 0.208433 | Infinity | < 0.0001 | Infinity | < 0.0001 |
| comp82078_c0_seq hmg176 isoform e                       | 0.099122 | 0        | 0 | 0        | 0.000    | 0.001    |          |          |
| comp81213_c0_seq cg31997 cg31997-pa                     | 0.080344 | 0        | 0 | 0.067222 | 0.000    | 0.009    | Infinity | 0.001    |
| comp85292_c0_seq probable atp-dependent rna helicase    | 0.330233 | 0.0495   | 0 | 0        | 0.150    | 0.000    |          |          |
| comp70916_c0_seq ribosomal protein s15                  | 0        | 0        | 0 | 0.158111 |          |          | Infinity | 0.002    |
| comp72945_c0_seq protease inhibitor 1                   | 0        | 0.029844 | 0 | 0        | Infinity | 0.024    |          |          |
| comp74087_c0_seq ribosomal protein l22                  | 0.009723 | 0.058133 | 0 | 0.250867 | 5.979    | < 0.0001 | Infinity | < 0.0001 |
| comp82543_c0_seq odorant-binding protein                | 0        | 0.164111 | 0 | 0.1256   | Infinity | < 0.0001 | Infinity | 0.003    |
| comp82543_c0_seq odorant-binding protein                | 0        | 0.203922 | 0 | 0.115989 | Infinity | 0.003    | Infinity | < 0.0001 |
| comp83319_c0_seq gloverin-like protein                  | 0        | 0.049122 | 0 | 0        | Infinity | 0.002    |          |          |
| comp83691_c0_seq farnesoic acid o-methyl transferase    | 0        | 0.022522 | 0 | 0        | Infinity | 0.008    |          |          |
| comp84067_c0_seq odorant-binding protein                | 0.858333 | 1.932444 | 0 | 2.791111 | 2.251    | 0.042    | Infinity | < 0.0001 |
| comp61985_c0_seq actin-depolymerizing factor 1          | 0.251827 | 0.346111 | 0 | 0.940778 | 1.374    | 0.125    | Infinity | < 0.0001 |
| comp70099_c0_seq ribosomal protein l27a                 | 0        | 0        | 0 | 0.215889 |          |          | Infinity | 0.006    |
| comp73968_c0_seq probable pterin-4-alpha-carbinolami    | 0.018918 | 0        | 0 | 0.079178 | 0.000    | 0.018    | Infinity | < 0.0001 |
| comp75709_c0_seq ribosomal protein l26                  | 0        | 0        | 0 | 0.079156 |          |          | Infinity | < 0.0001 |
| comp91705_c0_seq repressor splicing factor 1            | 0        | 0        | 0 | 0.076856 |          |          | Infinity | < 0.0001 |
| comp47494_c0_seq myosin light chain alkali-like isoform | 0        | 0.103056 | 0 | 0        | Infinity | < 0.0001 |          |          |
| comp73423_c0_seq ribosomal protein s16                  | 0.030262 | 0.053178 | 0 | 0.519667 | 1.757    | 0.008    | Infinity | < 0.0001 |
| comp79852_c0_seq ribosomal protein s14                  | 0.016609 | 0.053056 | 0 | 0.455445 | 3.194    | 0.014    | Infinity | < 0.0001 |
| comp80016_c1_seq ribosomal protein s13                  | 0.013822 | 0.088378 | 0 | 0.286245 | 6.394    | 0.000    | Infinity | < 0.0001 |
| comp47583_c0_seq 40s ribosomal protein s11              | 0        | 0.023741 | 0 | 0.204333 | Infinity | 0.021    | Infinity | < 0.0001 |
| comp69758_c0_seq ribosomal protein s18                  | 0.042669 | 0.079856 | 0 | 0.342778 | 1.872    | 0.001    | Infinity | < 0.0001 |
| comp70728_c0_seq nonmuscle myosin essential light cf    | 0        | 0        | 0 | 0.022911 |          |          | Infinity | 0.001    |
| comp78419_c0_seq ribosomal protein s19                  | 0        | 0.023364 | 0 | 0.215778 | Infinity | 0.003    | Infinity | < 0.0001 |
| comp88889_c0_seq niemann-pick type c-                   | 0.071388 | 0        | 0 | 0        | 0.000    | 0.002    |          |          |

|                                                          |          |          |   |          |          |          |          |          |
|----------------------------------------------------------|----------|----------|---|----------|----------|----------|----------|----------|
| comp79260_c0_seq 14 kda phosphohistidine phosphata       | 0.006577 | 0        | 0 | 0.018189 | 0.000    | 0.024    | Infinity | 0.028    |
| comp83496_c0_seq lipopolysaccharide-induced tumor n      | 0.068622 | 0        | 0 | 0        | 0.000    | < 0.0001 |          |          |
| comp47548_c0_seq ribosomal protein l24                   | 0        | 0        | 0 | 0.162667 |          |          | Infinity | < 0.0001 |
| comp73249_c0_seq ribosomal protein s10                   | 0.027525 | 0.071933 | 0 | 0.339444 | 2.613    | 0.000    | Infinity | < 0.0001 |
| comp90703_c0_seq hemocyte-specific integrin alpha su     | 0        | 0        | 0 | 0.035978 |          |          | Infinity | 0.006    |
| comp73794_c0_seq ribosomal protein l21                   | 0        | 0        | 0 | 0.211778 |          |          | Infinity | 0.000    |
| comp78720_c0_seq ribosomal protein l35a                  | 0.006739 | 0.024322 | 0 | 0.093222 | 3.609    | 0.024    | Infinity | 0.001    |
| comp78195_c0_seq eukaryotic translation initiation factc | 0        | 0.025067 | 0 | 0.073389 | Infinity | 0.017    | Infinity | < 0.0001 |
| comp87065_c0_seq 26s proteasome non-atpase regulat       | 0        | 0        | 0 | 0.051733 |          |          | Infinity | 0.001    |
| comp77591_c0_seq ribosomal protein l12                   | 0.039249 | 0.0663   | 0 | 0.189    | 1.689    | 0.037    | Infinity | 0.001    |
| comp79049_c0_seq cyclic amp-regulated protein            | 0        | 0        | 0 | 0.043579 |          |          | Infinity | 0.000    |
| comp4968_c0_seq1 kl-3 gamma dynein heavy chain           | 0        | 0        | 0 | 2.238778 |          |          | Infinity | 0.039    |
| comp2530993_c0_s hypothetical protein KGM_18714          | 0.210478 | 0.289067 | 0 | 0.181222 | 1.373    | 0.452    | Infinity | 0.002    |
| comp77535_c0_seq ribosomal protein l14                   | 0.036144 | 0.087467 | 0 | 0.274445 | 2.420    | 0.053    | Infinity | < 0.0001 |
| comp80362_c0_seq immune-related hdd11                    | 0.074067 | 0        | 0 | 0        | 0.000    | < 0.0001 |          |          |
| comp62814_c0_seq actin-related protein 2 3 complex su    | 0        | 0.012589 | 0 | 0        | Infinity | 0.003    |          |          |
| comp83421_c0_seq pseudouridine-5 -monophosphatas         | 0        | 0.0115   | 0 | 0.084433 | Infinity | 0.083    | Infinity | 0.013    |
| comp83964_c0_seq peritrophic membrane chitin binding     | 0.025022 | 0        | 0 | 0        | 0.000    | 0.013    |          |          |
| comp90800_c0_seq thiosulfate sulfurtransferase rhodan    | 0.087481 | 0        | 0 | 0        | 0.000    | < 0.0001 |          |          |
| comp781745_c0_se defective proboscis extension respc     | 0.009367 | 0        | 0 | 0        | 0.000    | 0.024    |          |          |
| comp82746_c1_seq glutathione s-transferase               | 0.05395  | 0.064267 | 0 | 0.216778 | 1.191    | 0.519    | Infinity | < 0.0001 |
| comp90425_c2_seq immunophilin fkbp46                     | 0        | 0        | 0 | 0.030556 |          |          | Infinity | 0.023    |
| comp89057_c0_seq lactoylglutathione lyase                | 0        | 0        | 0 | 0.051711 |          |          | Infinity | 0.001    |
| comp78080_c0_seq heat shock protein                      | 0        | 0.084389 | 0 | 0.127367 | Infinity | < 0.0001 | Infinity | < 0.0001 |
| comp80258_c0_seq proteasome maturation                   | 0        | 0        | 0 | 0.023486 |          |          | Infinity | 0.002    |
| comp83319_c0_seq antibacterial peptide                   | 0        | 0.112978 | 0 | 0        | Infinity | < 0.0001 |          |          |
| comp81117_c0_seq pancreatic lipase-related protein 2-l   | 0.055633 | 0        | 0 | 0        | 0.000    | 0.001    |          |          |
| comp47657_c0_seq ribosomal protein l18a                  | 0.012222 | 0.080767 | 0 | 0.372222 | 6.608    | 0.001    | Infinity | < 0.0001 |
| comp82692_c2_seq lysozyme-like protein 1                 | 0.3344   | 0.078578 | 0 | 0        | 0.235    | 0.001    |          |          |
| comp74009_c0_seq small heat shock protein                | 0        | 0.040811 | 0 | 0.1126   | Infinity | < 0.0001 | Infinity | < 0.0001 |
| comp82233_c0_seq juvenile hormone diol kinase            | 0        | 0.0953   | 0 | 0        | Infinity | < 0.0001 |          |          |
| comp69644_c0_seq adp-ribosylation factor 1               | 0.049132 | 0.060822 | 0 | 0.1217   | 1.238    | 0.208    | Infinity | 0.000    |
| comp61973_c0_seq ribosomal protein l18                   | 0        | 0.055344 | 0 | 0.318444 | Infinity | 0.012    | Infinity | < 0.0001 |
| comp77455_c0_seq ras-related protein rap-1b precursor    | 0.029469 | 0.029041 | 0 | 0.052989 | 0.985    | 0.959    | Infinity | < 0.0001 |

|                                                       |          |          |   |          |          |          |          |          |
|-------------------------------------------------------|----------|----------|---|----------|----------|----------|----------|----------|
| comp84010_c0_seq galectin partial                     | 0        | 0.033889 | 0 | 0.092322 | Infinity | 0.008    | Infinity | < 0.0001 |
| comp85548_c0_seq protein takeout-like                 | 0.054996 | 0        | 0 | 0        | 0.000    | 0.001    |          |          |
| comp88408_c1_seq dna supercoiling factor              | 0.053222 | 0        | 0 | 0        | 0.000    | < 0.0001 |          |          |
| comp82597_c0_seq hypothetical protein KGM_14540       | 0.009978 | 0        | 0 | 0        | 0.000    | 0.007    |          |          |
| comp73447_c0_seq 60s ribosomal protein l17            | 0.006788 | 0.047189 | 0 | 0.184222 | 6.952    | < 0.0001 | Infinity | < 0.0001 |
| comp81640_c0_seq peroxiredoxin 5                      | 0.035744 | 0.0175   | 0 | 0        | 0.490    | 0.009    |          |          |
| comp86291_c0_seq pacifastin-related peptide precursor | 0.091778 | 0.317556 | 0 | 0.054589 | 3.460    | 0.013    | Infinity | 0.004    |
| comp62070_c0_seq small heat shock protein             | 0        | 0.053033 | 0 | 0.116556 | Infinity | < 0.0001 | Infinity | 0.001    |
| comp84871_c0_seq calponin transgelin                  | 0.032489 | 0.061278 | 0 | 0.2022   | 1.886    | 0.180    | Infinity | 0.001    |
| comp61966_c0_seq ribosomal protein l9                 | 0.018637 | 0.064656 | 0 | 0.183689 | 3.469    | 0.005    | Infinity | < 0.0001 |
| comp79995_c2_seq ribosomal protein s7                 | 0.0121   | 0.048644 | 0 | 0.339445 | 4.020    | 0.000    | Infinity | < 0.0001 |
| comp85106_c1_seq af361483_1chymotrypsin inhibitor c   | 0.186667 | 0.805778 | 0 | 0.071011 | 4.317    | 0.038    | Infinity | < 0.0001 |
| comp69576_c0_seq ras-like gtp-binding protein rho1    | 0.070833 | 0.063744 | 0 | 0.066733 | 0.900    | 0.637    | Infinity | 0.001    |
| comp84508_c0_seq ras-related protein rac1             | 0.031833 | 0.029956 | 0 | 0.032111 | 0.941    | 0.907    | Infinity | < 0.0001 |
| comp84459_c0_seq gtp-binding protein sar1             | 0        | 0.039467 | 0 | 0.103067 | Infinity | < 0.0001 | Infinity | < 0.0001 |
| comp75402_c0_seq ribosomal protein s9                 | 0        | 0.068211 | 0 | 0.490333 | Infinity | 0.002    | Infinity | < 0.0001 |
| comp90582_c0_seq apolipoprotein d-like                | 0.073511 | 0        | 0 | 0        | 0.000    | 0.000    |          |          |
| comp83895_c0_seq glutathione peroxidase               | 0        | 0.2289   | 0 | 0.116278 | Infinity | 0.256    | Infinity | 0.001    |
| comp79229_c0_seq ribosomal protein l19                | 0        | 0.023111 | 0 | 0.395    | Infinity | 0.012    | Infinity | 0.001    |
| comp90508_c0_seq ras-like protein 2-like              | 0        | 0        | 0 | 0.008689 |          |          | Infinity | 0.028    |
| comp81163_c1_seq ras-related protein rab-1a-like      | 0.069767 | 0.034578 | 0 | 0.279    | 0.496    | 0.217    | Infinity | < 0.0001 |
| comp62115_c1_seq ribosomal protein l13a               | 0        | 0.051467 | 0 | 0.2078   | Infinity | 0.012    | Infinity | < 0.0001 |
| comp73487_c0_seq ribosomal protein l15                | 0        | 0.051844 | 0 | 0.2152   | Infinity | 0.001    | Infinity | < 0.0001 |
| comp85179_c2_seq glutathione s-transferase            | 0        | 0        | 0 | 0.508778 |          |          | Infinity | 0.006    |
| comp77814_c0_seq proteasome subunit beta type-2-like  | 0        | 0        | 0 | 0.105178 |          |          | Infinity | < 0.0001 |
| comp80050_c0_seq apolipoprotein d-like                | 0        | 0.051022 | 0 | 0.0507   | Infinity | < 0.0001 | Infinity | 0.002    |
| comp81852_c0_seq glutathione s-transferase            | 0        | 0        | 0 | 0.034511 |          |          | Infinity | 0.013    |
| comp84212_c0_seq attacin                              | 0        | 0.071122 | 0 | 0        | Infinity | < 0.0001 |          |          |
| comp27984_c0_seq ribosomal protein s8                 | 0.023927 | 0.084933 | 0 | 0.332222 | 3.550    | 0.009    | Infinity | < 0.0001 |
| comp80069_c0_seq ras-related protein rab-2a           | 0        | 0        | 0 | 0.057789 |          |          | Infinity | 0.001    |
| comp81216_c0_seq udp-glucose pyrophosphatase          | 0.019514 | 0        | 0 | 0        | 0.000    | 0.009    |          |          |
| comp84810_c0_seq glutathione s-transferase            | 0.089372 | 0        | 0 | 0.221889 | 0.000    | 0.000    | Infinity | 0.024    |
| comp86621_c0_seq nascent polypeptide associated con   | 0        | 0        | 0 | 0.071111 |          |          | Infinity | < 0.0001 |
| comp72561_c0_seq ras-related protein rab-11a-like     | 0.046356 | 0.073356 | 0 | 0.168378 | 1.582    | 0.082    | Infinity | < 0.0001 |

|                                                          |          |          |   |          |          |          |          |          |
|----------------------------------------------------------|----------|----------|---|----------|----------|----------|----------|----------|
| comp76772_c0_seq gtp-binding nuclear protein ran         | 0.0502   | 0.059533 | 0 | 0.084256 | 1.186    | 0.574    | Infinity | 0.001    |
| comp84035_c0_seq cytidylate kinase                       | 0        | 0.061767 | 0 | 0.049478 | Infinity | 0.000    | Infinity | 0.000    |
| comp84810_c1_seq glutathione s-transferase               | 0        | 0        | 0 | 0.360889 |          |          | Infinity | < 0.0001 |
| comp86356_c1_seq adenylyl cyclase-associated protein     | 0        | 0        | 0 | 0.014733 |          |          | Infinity | 0.001    |
| comp79180_c0_seq eukaryotic translation initiation factc | 0        | 0        | 0 | 0.068667 |          |          | Infinity | 0.006    |
| comp79945_c0_seq fk506-binding protein                   | 0.069344 | 0        | 0 | 0.112178 | 0.000    | < 0.0001 | Infinity | < 0.0001 |
| comp82070_c0_seq 46 kda fk506-binding nuclear protei     | 0        | 0        | 0 | 0.016278 |          |          | Infinity | 0.024    |
| comp88925_c0_seq spondin-2-like isoform 1                | 0        | 0.040411 | 0 | 0        | Infinity | 0.024    |          |          |
| comp27991_c0_seq rna-binding protein squid-like isoform  | 0        | 0.0116   | 0 | 0.176289 | Infinity | 0.010    | Infinity | < 0.0001 |
| comp73704_c0_seq ribosomal protein l10a                  | 0.006869 | 0.049089 | 0 | 0.244111 | 7.147    | 0.000    | Infinity | < 0.0001 |
| comp90604_c1_seq heat shock 70 kda protein cognate       | 0        | 0        | 0 | 0.024802 |          |          | Infinity | 0.010    |
| comp77551_c0_seq ribosomal protein s5                    | 0.042112 | 0.070967 | 0 | 0.534222 | 1.685    | 0.057    | Infinity | < 0.0001 |
| comp78328_c0_seq ribosomal protein l10                   | 0        | 0.0319   | 0 | 0.143411 | Infinity | 0.001    | Infinity | 0.002    |
| comp81916_c0_seq glutathione s-transferase               | 0        | 0        | 0 | 0.100144 |          |          | Infinity | < 0.0001 |
| comp83420_c0_seq tetraspanin e118                        | 0        | 0.097467 | 0 | 0        | Infinity | < 0.0001 |          |          |
| comp84452_c1_seq glutathione s-transferase               | 0        | 0.084944 | 0 | 0.207045 | Infinity | < 0.0001 | Infinity | 0.001    |
| comp73852_c0_seq ribosomal protein l13                   | 0.030317 | 0.074011 | 0 | 0.377778 | 2.441    | 0.008    | Infinity | < 0.0001 |
| comp91365_c0_seq PREDICTED: uncharacterized prote        | 0.024023 | 0        | 0 | 0        | 0.000    | 0.022    |          |          |
| comp84128_c1_seq glutathione s-transferase epsilon 2     | 0        | 0.036222 | 0 | 0.0465   | Infinity | < 0.0001 | Infinity | 0.000    |
| comp80737_c0_seq peroxiredoxin 6                         | 0        | 0.013242 | 0 | 0        | Infinity | 0.000    |          |          |
| comp62653_c0_seq ribulose-phosphate 3-epimerase-lik      | 0.016871 | 0        | 0 | 0.0669   | 0.000    | 0.006    | Infinity | < 0.0001 |
| comp83162_c0_seq trypsin-like serine proteinase t26      | 0.078736 | 0        | 0 | 0        | 0.000    | 0.001    |          |          |
| comp82514_c0_seq molting carboxypeptidase a              | 0.120073 | 0        | 0 | 0        | 0.000    | 0.002    |          |          |
| comp87702_c0_seq glucose-1-phosphatase                   | 0.445333 | 0.420778 | 0 | 0.084278 | 0.945    | 0.856    | Infinity | 0.002    |
| comp27960_c0_seq proteasome subunit beta type-1          | 0.011728 | 0        | 0 | 0.121622 | 0.000    | 0.020    | Infinity | < 0.0001 |
| comp81166_c0_seq chlorophyllide a binding protein prec   | 0        | 0.022178 | 0 | 0        | Infinity | 0.029    |          |          |
| comp82085_c0_seq multisynthetase auxiliary               | 0        | 0        | 0 | 0.021433 |          |          | Infinity | 0.026    |
| comp83050_c0_seq apolipoprotein d-like                   | 0.050933 | 0        | 0 | 0        | 0.000    | < 0.0001 |          |          |
| comp85583_c1_seq ubiquitin-like protein smt3             | 0.109578 | 0.117667 | 0 | 0.1353   | 1.074    | 0.864    | Infinity | < 0.0001 |
| comp79873_c0_seq glutathione s-transferase 1-like        | 0        | 0        | 0 | 0.038344 |          |          | Infinity | 0.035    |
| comp82081_c0_seq proteasome subunit alpha type-2-lik     | 0.013094 | 0        | 0 | 0.052478 | 0.000    | 0.007    | Infinity | 0.002    |
| comp83817_c0_seq dihydropteridine reductase              | 0.090133 | 0.098467 | 0 | 0.304778 | 1.092    | 0.686    | Infinity | < 0.0001 |
| comp82162_c0_seq calcyclin-binding protein               | 0        | 0.0183   | 0 | 0.079989 | Infinity | < 0.0001 | Infinity | 0.000    |
| comp90788_c0_seq ribose-5-phosphate isomerase            | 0.013509 | 0        | 0 | 0.068078 | 0.000    | 0.005    | Infinity | 0.002    |

|                                                        |          |          |   |          |          |          |          |          |
|--------------------------------------------------------|----------|----------|---|----------|----------|----------|----------|----------|
| comp78261_c0_seq elongation factor 1 delta             | 0        | 0.0285   | 0 | 0.089833 | Infinity | 0.001    | Infinity | < 0.0001 |
| comp81046_c0_seq control protein hctl023               | 0.162    | 0.203489 | 0 | 0.305778 | 1.256    | 0.445    | Infinity | < 0.0001 |
| comp82036_c0_seq gasp precursor                        | 0.016189 | 0.024378 | 0 | 0.056156 | 1.506    | 0.358    | Infinity | < 0.0001 |
| comp88925_c0_seq spon2b protein                        | 0.197222 | 0        | 0 | 0        | 0.000    | < 0.0001 |          |          |
| comp75881_c0_seq osiris 9                              | 0        | 0.020444 | 0 | 0        | Infinity | 0.011    |          |          |
| comp84437_c0_seq takeout jhbp like protein             | 0.039089 | 0        | 0 | 0.111556 | 0.000    | 0.065    | Infinity | 0.001    |
| comp78694_c0_seq juvenile hormone binding protein      | 0        | 0        | 0 | 0.0453   |          |          | Infinity | 0.001    |
| comp85190_c0_seq takeout jhbp like protein             | 0        | 0        | 0 | 0.029044 |          |          | Infinity | < 0.0001 |
| comp72043_c0_seq small glutamine-rich tetratricopeptic | 0.003109 | 0        | 0 | 0.022178 | 0.000    | 0.127    | Infinity | 0.002    |
| comp79223_c0_seq ribosomal protein s3                  | 0.069217 | 0.153233 | 0 | 0.420222 | 2.214    | 0.006    | Infinity | < 0.0001 |
| comp80236_c0_seq protein takeout-like                  | 0.025167 | 0        | 0 | 0        | 0.000    | 0.000    |          |          |
| comp85232_c0_seq proteasome subunit alpha type-5       | 0.003868 | 0.0301   | 0 | 0.177511 | 7.782    | 0.030    | Infinity | 0.000    |
| comp87445_c0_seq proteasome activator complex subu     | 0.011353 | 0        | 0 | 0.057122 | 0.000    | 0.014    | Infinity | 0.001    |
| comp75805_c0_seq proteasome subunit alpha type-6       | 0        | 0.030867 | 0 | 0.154467 | Infinity | 0.000    | Infinity | < 0.0001 |
| comp83397_c0_seq v-type proton atpase subunit d 1-like | 0        | 0.036044 | 0 | 0.076756 | Infinity | < 0.0001 | Infinity | < 0.0001 |
| comp88494_c0_seq 2-cys peroxiredoxin                   | 0.059267 | 0.108356 | 0 | 0.272333 | 1.828    | 0.094    | Infinity | < 0.0001 |
| comp80760_c0_seq takeout jhbp like protein             | 0.026889 | 0        | 0 | 0        | 0.000    | 0.005    |          |          |
| comp80881_c0_seq proteasome beta-subunit               | 0.01443  | 0.049478 | 0 | 0.231444 | 3.429    | < 0.0001 | Infinity | < 0.0001 |
| comp78012_c0_seq 15-hydroxyprostaglandin dehydroge     | 0.01257  | 0        | 0 | 0.115278 | 0.000    | 0.005    | Infinity | < 0.0001 |
| comp82890_c0_seq takeout jhbp like protein             | 0.073948 | 0.022457 | 0 | 0        | 0.304    | 0.005    |          |          |
| comp84904_c0_seq chondroitin proteoglycan-2-like       | 0        | 0.039589 | 0 | 0        | Infinity | < 0.0001 |          |          |
| comp83878_c0_seq hydroxybutyrate dehydrogenase         | 0        | 0.15     | 0 | 0        | Infinity | 0.004    |          |          |
| comp83998_c0_seq circadian clock-controlled            | 0.1408   | 0        | 0 | 0.026    | 0.000    | 0.000    | Infinity | 0.007    |
| comp88010_c0_seq isoform b                             | 0        | 0.0598   | 0 | 0        | Infinity | 0.002    |          |          |
| comp69359_c0_seq ribosomal protein s6                  | 0.031144 | 0.066889 | 0 | 0.426333 | 2.148    | 0.001    | Infinity | < 0.0001 |
| comp80386_c0_seq 3-hydroxyacyl- dehydrogenase          | 0        | 0        | 0 | 0.013839 |          |          | Infinity | 0.005    |
| comp84603_c0_seq protein creg1-like                    | 0.066057 | 0        | 0 | 0        | 0.000    | 0.000    |          |          |
| comp84896_c0_seq proteasome subunit alpha type-3       | 0        | 0.029    | 0 | 0.352333 | Infinity | 0.001    | Infinity | 0.113    |
| comp84578_c0_seq flavin reductase-like                 | 0.015278 | 0        | 0 | 0.052689 | 0.000    | 0.031    | Infinity | < 0.0001 |
| comp74020_c0_seq ribosomal protein l8                  | 0.016    | 0.056567 | 0 | 0.371667 | 3.535    | 0.002    | Infinity | < 0.0001 |
| comp82945_c0_seq proteasome alpha 4 subunit            | 0        | 0        | 0 | 0.093311 |          |          | Infinity | < 0.0001 |
| comp85967_c0_seq frizzled isoform a                    | 0.078236 | 0        | 0 | 0        | 0.000    | 0.000    |          |          |
| comp85400_c1_seq protein takeout-like                  | 0.014244 | 0        | 0 | 0        | 0.000    | 0.002    |          |          |
| comp85143_c0_seq hydroxypyruvate isomerase             | 0.144433 | 0.128322 | 0 | 0.148556 | 0.888    | 0.689    | Infinity | < 0.0001 |



|                                                           |          |          |   |          |          |          |          |          |
|-----------------------------------------------------------|----------|----------|---|----------|----------|----------|----------|----------|
| comp79231_c0_seq ribosomal protein s2                     | 0        | 0.045344 | 0 | 0.245444 | Infinity | 0.001    | Infinity | < 0.0001 |
| comp83126_c0_seq juvenile hormone binding protein         | 0.007751 | 0        | 0 | 0        | 0.000    | 0.034    |          |          |
| comp83259_c0_seq fibroin light chain                      | 0.048343 | 0        | 0 | 0        | 0.000    | 0.041    |          |          |
| comp28383_c0_seq 14-3-3 protein epsilon-like              | 0.08     | 0.190678 | 0 | 0.284889 | 2.383    | 0.012    | Infinity | < 0.0001 |
| comp62089_c0_seq ribosomal protein l7                     | 0.02621  | 0.099244 | 0 | 0.565    | 3.787    | < 0.0001 | Infinity | < 0.0001 |
| comp81502_c0_seq short-chain dehydrogenase reduct         | 0.019822 | 0.0309   | 0 | 0.062936 | 1.559    | 0.117    | Infinity | 0.001    |
| comp27988_c0_seq ribosomal protein s4e                    | 0.024223 | 0.0595   | 0 | 0.513111 | 2.456    | < 0.0001 | Infinity | < 0.0001 |
| comp86696_c0_seq proteasome subunit beta type-4-like      | 0        | 0        | 0 | 0.081567 |          |          | Infinity | < 0.0001 |
| comp88993_c0_seq tetraspanin d107                         | 0.142567 | 0.093878 | 0 | 0.136944 | 0.658    | 0.131    | Infinity | 0.000    |
| comp83745_c0_seq trypsin-like serine protease             | 0.012856 | 0        | 0 | 0        | 0.000    | 0.027    |          |          |
| comp83400_c0_seq zinc finger protein 420-like             | 0.073111 | 0        | 0 | 0        | 0.000    | 0.006    |          |          |
| comp86499_c0_seq sepiapterin reductase-like               | 0        | 0.065044 | 0 | 0.222022 | Infinity | < 0.0001 | Infinity | < 0.0001 |
| comp90640_c1_seq probable g-protein coupled receptor      | 0.076167 | 0        | 0 | 0        | 0.000    | < 0.0001 |          |          |
| comp80269_c0_seq ribosomal protein l7a                    | 0.006762 | 0.028944 | 0 | 0.177556 | 4.280    | 0.094    | Infinity | 0.000    |
| comp80777_c0_seq 26s proteasome non-atpase regulator      | 0        | 0        | 0 | 0.0493   |          |          | Infinity | < 0.0001 |
| comp77232_c0_seq isoform a                                | 0.055054 | 0        | 0 | 0.056032 | 0.000    | < 0.0001 | Infinity | 0.002    |
| comp82914_c0_seq ommochrome binding protein 1             | 0.04302  | 0        | 0 | 0        | 0.000    | < 0.0001 |          |          |
| comp88907_c1_seq glucosylceramidase-like                  | 0.072377 | 0        | 0 | 0        | 0.000    | 0.020    |          |          |
| comp79210_c0_seq control protein hct1025                  | 0        | 0        | 0 | 0.302556 |          |          | Infinity | < 0.0001 |
| comp81977_c0_seq beat protein                             | 0.228122 | 0.064267 | 0 | 0        | 0.282    | 0.000    |          |          |
| comp83316_c0_seq phytanoyl- dioxygenase                   | 0        | 0        | 0 | 0.111456 |          |          | Infinity | < 0.0001 |
| comp88862_c0_seq pyrroline-5-carboxylate reductase        | 0.108289 | 0.080911 | 0 | 0.235444 | 0.747    | 0.279    | Infinity | < 0.0001 |
| comp77206_c0_seq serine protease 2                        | 0.017044 | 0        | 0 | 0        | 0.000    | 0.015    |          |          |
| comp84147_c0_seq somatomedin-b and thrombospondin         | 0.122622 | 0.131433 | 0 | 0.066233 | 1.072    | 0.842    | Infinity | < 0.0001 |
| comp87853_c0_seq proteasome subunit alpha type-1-like     | 0.024308 | 0.027778 | 0 | 0.066    | 1.143    | 0.637    | Infinity | < 0.0001 |
| comp88430_c0_seq isoform c                                | 0        | 0.013078 | 0 | 0        | Infinity | 0.009    |          |          |
| comp28016_c0_seq eukaryotic translation initiation factor | 0        | 0        | 0 | 0.033633 |          |          | Infinity | 0.001    |
| comp87234_c0_seq sodium potassium-transporting atpase     | 0.010213 | 0        | 0 | 0        | 0.000    | 0.001    |          |          |
| comp77940_c0_seq proteasome subunit beta 7                | 0        | 0        | 0 | 0.111411 |          |          | Infinity | < 0.0001 |
| comp81977_c0_seq beat protein                             | 0.123556 | 0        | 0 | 0        | 0.000    | 0.023    |          |          |
| comp85532_c0_seq beat protein                             | 0.196078 | 0.045289 | 0 | 0.021289 | 0.231    | 0.001    | Infinity | 0.000    |
| comp86394_c0_seq glyoxalase domain-containing protein     | 0.015626 | 0        | 0 | 0        | 0.000    | 0.008    |          |          |
| comp87627_c0_seq low quality protein: neuroglian-like     | 0.141378 | 0.075833 | 0 | 0.023111 | 0.536    | 0.010    | Infinity | 0.003    |
| comp81695_c0_seq c3 and pzp-like alpha-2-macroglobulin    | 0.041589 | 0.088756 | 0 | 0.247778 | 2.134    | 0.025    | Infinity | 0.001    |

|                                                          |          |          |   |          |          |          |          |          |
|----------------------------------------------------------|----------|----------|---|----------|----------|----------|----------|----------|
| comp82662_c0_seq spermidine synthase                     | 0.0223   | 0        | 0 | 0.025156 | 0.000    | 0.016    | Infinity | 0.007    |
| comp84349_c0_seq carbonyl reductase                      | 0.011165 | 0.008267 | 0 | 0.036944 | 0.740    | 0.577    | Infinity | < 0.0001 |
| comp87343_c0_seq chymotrypsinogen-like protein           | 0        | 0.050089 | 0 | 0        | Infinity | < 0.0001 |          |          |
| comp78495_c0_seq chymotrypsin-like serine protease       | 0.018733 | 0        | 0 | 0        | 0.000    | 0.008    |          |          |
| comp83320_c0_seq gtp cyclohydrolase i isoform b          | 0        | 0.0543   | 0 | 0.324122 | Infinity | < 0.0001 | Infinity | < 0.0001 |
| comp86069_c0_seq glycine n-methyltransferase-like        | 0.022304 | 0        | 0 | 0.073133 | 0.000    | 0.001    | Infinity | < 0.0001 |
| comp80037_c0_seq chymotrypsin-like serine protease       | 0.041311 | 0        | 0 | 0        | 0.000    | 0.006    |          |          |
| comp84735_c0_seq chymotrypsin                            | 0.087957 | 0.028689 | 0 | 0        | 0.326    | 0.047    |          |          |
| comp88050_c0_seq 27 kda hemolymph protein                | 0.081311 | 0.143144 | 0 | 0.093767 | 1.760    | 0.068    | Infinity | 0.002    |
| comp90682_c0_seq pancreatic triacylglycerol lipase       | 0.040367 | 0        | 0 | 0.067    | 0.000    | 0.002    | Infinity | 0.023    |
| comp91510_c0_seq alpha-2-macroglobulin-like protein 1    | 0.016499 | 0        | 0 | 0        | 0.000    | 0.007    |          |          |
| comp78566_c0_seq ribosomal protein l23a                  | 0        | 0        | 0 | 0.219111 |          |          | Infinity | < 0.0001 |
| comp81218_c0_seq c-type lectin 17                        | 0        | 0.090511 | 0 | 0        | Infinity | 0.000    |          |          |
| comp87445_c0_seq carboxy-terminal domain rna polym       | 0.064156 | 0.0202   | 0 | 0        | 0.315    | 0.008    |          |          |
| comp78635_c0_seq ribosomal protein l5                    | 0.016398 | 0.088067 | 0 | 0.215778 | 5.371    | 0.001    | Infinity | < 0.0001 |
| comp82763_c0_seq luciferin regenerating enzyme           | 0        | 0        | 0 | 0.0454   |          |          | Infinity | 0.000    |
| comp83506_c0_seq n-acetylneuraminate lyase               | 0.02171  | 0.045422 | 0 | 0.138011 | 2.092    | 0.011    | Infinity | < 0.0001 |
| comp88131_c1_seq cytosolic non-specific dipeptidase-li   | 0        | 0        | 0 | 0.044256 |          |          | Infinity | 0.002    |
| comp81120_c0_seq c-type lectin                           | 0.0355   | 0        | 0 | 0        | 0.000    | < 0.0001 |          |          |
| comp82889_c0_seq ubiquinone biosynthesis protein mit     | 0        | 0.051011 | 0 | 0.047322 | Infinity | 0.116    | Infinity | 0.002    |
| comp77458_c0_seq protein sec13 homolog                   | 0        | 0        | 0 | 0.016356 |          |          | Infinity | 0.023    |
| comp81417_c1_seq ribosomal protein p0                    | 0.049832 | 0.133378 | 0 | 0.264111 | 2.677    | < 0.0001 | Infinity | < 0.0001 |
| comp85800_c0_seq aldo-keto reductase                     | 0.185667 | 0.257444 | 0 | 0.275456 | 1.387    | 0.149    | Infinity | < 0.0001 |
| comp91235_c0_seq carbohydrate sulfotransferase 11-lik    | 0.072752 | 0        | 0 | 0        | 0.000    | < 0.0001 |          |          |
| comp84194_c0_seq receptor for activated protein kinase   | 0.045141 | 0.064011 | 0 | 0.178333 | 1.418    | 0.237    | Infinity | < 0.0001 |
| comp83460_c0_seq nad-dependent epimerase dehydrat        | 0.015328 | 0        | 0 | 0        | 0.000    | 0.006    |          |          |
| comp83716_c0_seq aldo-keto reductase                     | 0.405354 | 0.266889 | 0 | 0.111467 | 0.658    | 0.168    | Infinity | < 0.0001 |
| comp86297_c0_seq lambda-crystallin homolog               | 0.049367 | 0.034844 | 0 | 0.130189 | 0.706    | 0.266    | Infinity | 0.000    |
| comp87955_c0_seq annexin ix-c                            | 0.0265   | 0.061111 | 0 | 0.041322 | 2.306    | 0.002    | Infinity | 0.004    |
| comp83350_c0_seq purine nucleoside phosphorylase-lik     | 0.039839 | 0        | 0 | 0        | 0.000    | 0.000    |          |          |
| comp84747_c2_seq fumarylacetoacetate hydrolase dom       | 0.024896 | 0        | 0 | 0.023111 | 0.000    | < 0.0001 | Infinity | 0.008    |
| comp89042_c0_seq lysosome-associated membrane gl         | 0.196933 | 0.043133 | 0 | 0.103358 | 0.219    | 0.001    | Infinity | 0.003    |
| comp83601_c0_seq s-formylglutathione hydrolase           | 0.039051 | 0.038778 | 0 | 0.061967 | 0.993    | 0.985    | Infinity | 0.002    |
| comp83522_c0_seq eukaryotic translation initiation factc | 0        | 0        | 0 | 0.033856 |          |          | Infinity | 0.011    |

|                                                          |          |          |   |          |          |          |          |          |
|----------------------------------------------------------|----------|----------|---|----------|----------|----------|----------|----------|
| comp85056_c2_seq d-3-phosphoglycerate dehydrogena        | 0.110274 | 0.060333 | 0 | 0.274222 | 0.547    | 0.077    | Infinity | < 0.0001 |
| comp87164_c0_seq c-type lectin                           | 1.091111 | 1.413667 | 0 | 0.956667 | 1.296    | 0.531    | Infinity | 0.006    |
| comp86908_c0_seq neutral lipase                          | 0.058922 | 0        | 0 | 0        | 0.000    | 0.000    |          |          |
| comp84096_c1_seq cytosolic malate dehydrogenase          | 0.124951 | 0.072911 | 0 | 0.149667 | 0.584    | 0.101    | Infinity | < 0.0001 |
| comp83520_c1_seq alcohol dehydrogenase                   | 0.016533 | 0        | 0 | 0.067211 | 0.000    | 0.011    | Infinity | 0.001    |
| comp87134_c0_seq 26s proteasome non-atpase regulat       | 0        | 0        | 0 | 0.067011 |          |          | Infinity | 0.002    |
| comp87403_c1_seq transaldolase                           | 0.06306  | 0.071967 | 0 | 0.217667 | 1.141    | 0.620    | Infinity | < 0.0001 |
| comp88174_c0_seq seminal fluid protein hacp058           | 2.67     | 6.672222 | 0 | 3.304444 | 2.499    | 0.016    | Infinity | < 0.0001 |
| comp84693_c0_seq eukaryotic translation initiation factc | 0        | 0        | 0 | 0.029708 |          |          | Infinity | 0.000    |
| comp71428_c0_seq inorganic pyrophosphatase               | 0.065093 | 0.065922 | 0 | 0.123533 | 1.013    | 0.969    | Infinity | < 0.0001 |
| comp86752_c0_seq aldo-keto reductase                     | 0        | 0.133911 | 0 | 0.227333 | Infinity | 0.001    | Infinity | < 0.0001 |
| comp72963_c0_seq activator of 90 kda heat shock prote    | 0.005611 | 0        | 0 | 0        | 0.000    | 0.023    |          |          |
| comp86487_c0_seq proteasome partial                      | 0        | 0        | 0 | 0.052333 |          |          | Infinity | < 0.0001 |
| comp86519_c0_seq phosphoribosyl-pyrophosphate synt       | 0.015178 | 0        | 0 | 0.125656 | 0.000    | 0.023    | Infinity | < 0.0001 |
| comp83080_c0_seq zinc-containing alcohol dehydrogen.     | 0        | 0        | 0 | 0.048156 |          |          | Infinity | < 0.0001 |
| comp86067_c0_seq mutant cadherin                         | 0        | 0.034644 | 0 | 0        | Infinity | 0.031    |          |          |
| comp88392_c0_seq torso-like protein                      | 0.010711 | 0        | 0 | 0        | 0.000    | 0.008    |          |          |
| comp78310_c0_seq isoform a                               | 0        | 0.004391 | 0 | 0.102756 | Infinity | 0.040    | Infinity | < 0.0001 |
| comp82459_c0_seq phosphoribosyl pyrophosphate synt       | 0        | 0        | 0 | 0.015121 |          |          | Infinity | 0.017    |
| comp89059_c1_seq aggrecan core                           | 0        | 0.0738   | 0 | 0        | Infinity | 0.004    |          |          |
| comp89233_c1_seq glycerol-3-phosphate dehydrogenas       | 0.039427 | 0.103233 | 0 | 0.032856 | 2.618    | 0.293    | Infinity | 0.000    |
| comp87106_c0_seq cuticle protein cpr149                  | 0        | 0.008633 | 0 | 0        | Infinity | 0.006    |          |          |
| comp84056_c0_seq sorbitol dehydrogenase                  | 0.0308   | 0        | 0 | 0        | 0.000    | 0.007    |          |          |
| comp84517_c0_seq trypsin-like serine proteinase t26      | 0.039967 | 0        | 0 | 0        | 0.000    | < 0.0001 |          |          |
| comp90400_c0_seq amine oxidase                           | 0.379889 | 0        | 0 | 0.191444 | 0.000    | 0.023    | Infinity | 0.006    |
| comp90408_c0_seq h aca ribonucleoprotein complex su      | 0        | 0        | 0 | 0.035678 |          |          | Infinity | < 0.0001 |
| comp61989_c0_seq heterogeneous nuclear ribonucleop       | 0        | 0        | 0 | 0.0186   |          |          | Infinity | 0.042    |
| comp86956_c0_seq fructose -bisphosphate aldolase         | 0.117344 | 0        | 0 | 0        | 0.000    | 0.001    |          |          |
| comp82782_c0_seq lipoic acid synthase                    | 0        | 0.196111 | 0 | 0        | Infinity | 0.000    |          |          |
| comp79690_c0_seq gamma-glutamyl hydrolase                | 0.103033 | 0.138722 | 0 | 0.073178 | 1.346    | 0.321    | Infinity | 0.000    |
| comp84887_c0_seq fibril-forming collagen alpha chain-li  | 0.013936 | 0.090078 | 0 | 0.147222 | 6.464    | 0.001    | Infinity | < 0.0001 |
| comp84510_c0_seq serpin 2                                | 0.100356 | 0.145556 | 0 | 0.0847   | 1.450    | 0.242    | Infinity | 0.000    |
| comp86703_c0_seq l-allo-threonine aldolase               | 0        | 0.018911 | 0 | 0.042533 | Infinity | 0.009    | Infinity | 0.000    |
| comp84513_c0_seq glycerophosphoryl diester periplasr     | 0.317378 | 0.303333 | 0 | 0.194989 | 0.956    | 0.789    | Infinity | 0.001    |

|                                                          |          |          |   |          |          |          |          |          |
|----------------------------------------------------------|----------|----------|---|----------|----------|----------|----------|----------|
| comp83772_c0_seq proliferation-associated protein 2g4    | 0.041344 | 0        | 0 | 0.063933 | 0.000    | < 0.0001 | Infinity | < 0.0001 |
| comp79703_c0_seq nucleosome assembly protein isofo       | 0        | 0        | 0 | 0.089611 |          |          | Infinity | < 0.0001 |
| comp76992_c0_seq chaperonin subunit 4 delta              | 0        | 0.014002 | 0 | 0.068644 | Infinity | 0.008    | Infinity | < 0.0001 |
| comp85527_c0_seq eukaryotic translation initiation factc | 0        | 0        | 0 | 0.082833 |          |          | Infinity | < 0.0001 |
| comp87174_c0_seq 26s proteasome non-atpase regulai       | 0        | 0        | 0 | 0.048044 |          |          | Infinity | 0.000    |
| comp87963_c0_seq antennal esterase cxe10                 | 0        | 0.047011 | 0 | 0        | Infinity | 0.000    |          |          |
| comp87396_c0_seq aliphatic nitrilase                     | 0.097044 | 0.043267 | 0 | 1.002556 | 0.446    | 0.001    | Infinity | < 0.0001 |
| comp83964_c0_seq peritrophic membrane chitin bindingç    | 0.116529 | 0.161822 | 0 | 0.019222 | 1.389    | 0.173    | Infinity | 0.023    |
| comp86444_c0_seq 26s protease regulatory subunit s1C     | 0        | 0        | 0 | 0.066268 |          |          | Infinity | 0.000    |
| comp88570_c0_seq vacuolar h                              | 0.092696 | 0        | 0 | 0        | 0.000    | 0.007    |          |          |
| comp87837_c1_seq ribonuclease l inhibitor homolog        | 0        | 0        | 0 | 0.016756 |          |          | Infinity | 0.031    |
| comp84269_c0_seq calreticulin                            | 0        | 0        | 0 | 0.107467 |          |          | Infinity | < 0.0001 |
| comp86728_c0_seq serine protease inhibitor partial       | 0.049411 | 0.017233 | 0 | 0.036544 | 0.349    | 0.001    | Infinity | 0.003    |
| comp86107_c0_seq 26s protease regulatory subunit 8-li    | 0        | 0        | 0 | 0.083567 |          |          | Infinity | < 0.0001 |
| comp88696_c0_seq mannose-6-phosphate isomerase-li        | 0.037713 | 0        | 0 | 0        | 0.000    | 0.000    |          |          |
| comp89559_c0_seq yellow-c                                | 0.013192 | 0        | 0 | 0        | 0.000    | 0.021    |          |          |
| comp82649_c0_seq glutamine-oxaloacetic transaminase      | 0.024831 | 0        | 0 | 0.035811 | 0.000    | 0.002    | Infinity | < 0.0001 |
| comp89394_c0_seq alpha-galactosidase alpha-n-acetylç     | 0.015811 | 0        | 0 | 0        | 0.000    | 0.025    |          |          |
| comp87505_c0_seq ornithine mitochondrial-like            | 0.039922 | 0        | 0 | 0.025644 | 0.000    | < 0.0001 | Infinity | 0.008    |
| comp91357_c2_seq disintegrin and metalloproteinase di    | 0.031267 | 0.005811 | 0 | 0        | 0.186    | 0.004    |          |          |
| comp82105_c0_seq potassium sodium hyperpolarizator       | 0        | 0.0116   | 0 | 0        | Infinity | 0.023    |          |          |
| comp82634_c2_seq ribosomal protein l3                    | 0.043933 | 0.058778 | 0 | 0.313556 | 1.338    | 0.451    | Infinity | < 0.0001 |
| comp89780_c1_seq c1a cysteine protease precursor         | 1.117333 | 0.379556 | 0 | 0        | 0.340    | < 0.0001 |          |          |
| comp81820_c0_seq 26s protease regulatory subunit 6b      | 0        | 0        | 0 | 0.041922 |          |          | Infinity | 0.000    |
| comp83089_c0_seq atp synthase subunit mitochondrial-     | 0        | 0        | 0 | 0.0103   |          |          | Infinity | 0.026    |
| comp84275_c0_seq phosphoglycerate kinase                 | 0.1017   | 0.103522 | 0 | 0.197778 | 1.018    | 0.939    | Infinity | < 0.0001 |
| comp88616_c0_seq alpha-amylase                           | 0.092067 | 0.142667 | 0 | 0.165044 | 1.550    | 0.171    | Infinity | 0.000    |
| comp80026_c2_seq eukaryotic initiation factor 4a         | 0.069044 | 0.040611 | 0 | 0.101011 | 0.588    | 0.104    | Infinity | < 0.0001 |
| comp79326_c0_seq t-complex protein 1 subunit delta-lik   | 0.007626 | 0.037111 | 0 | 0.1919   | 4.867    | 0.000    | Infinity | < 0.0001 |
| comp86250_c0_seq PREDICTED: uncharacterized prote        | 0.053411 | 0        | 0 | 0        | 0.000    | 0.022    |          |          |
| comp79910_c0_seq carboxypeptidase b precursor            | 0.0089   | 0        | 0 | 0        | 0.000    | 0.006    |          |          |
| comp85000_c1_seq synaptic vesicle membrane protein       | 0        | 0        | 0 | 0.042067 |          |          | Infinity | 0.001    |
| comp87155_c0_seq yellow- isoform a                       | 0        | 0        | 0 | 0.017656 |          |          | Infinity | 0.015    |
| comp87212_c0_seq synaptotagmin 1                         | 0.00945  | 0        | 0 | 0        | 0.000    | 0.041    |          |          |

|                                                          |          |          |   |          |          |          |          |          |
|----------------------------------------------------------|----------|----------|---|----------|----------|----------|----------|----------|
| comp81026_c0_seq ribosomal protein l4                    | 0.010477 | 0.082411 | 0 | 0.359778 | 7.866    | 0.012    | Infinity | < 0.0001 |
| comp86676_c0_seq protein yellow-like                     | 0.018878 | 0        | 0 | 0        | 0.000    | < 0.0001 |          |          |
| comp88513_c2_seq lachesin-like isoform 2                 | 0.074189 | 0        | 0 | 0        | 0.000    | < 0.0001 |          |          |
| comp85033_c0_seq 26s protease regulatory subunit 6a      | 0        | 0        | 0 | 0.090722 |          |          | Infinity | < 0.0001 |
| comp84570_c0_seq sucrose-6-phosphate hydrolase           | 0.065212 | 0        | 0 | 0        | 0.000    | < 0.0001 |          |          |
| comp85867_c0_seq aminoacylase-1a-like isoform x1         | 0.026127 | 0        | 0 | 0        | 0.000    | 0.042    |          |          |
| comp88337_c0_seq 26s protease regulatory subunit 7       | 0        | 0        | 0 | 0.028389 |          |          | Infinity | 0.000    |
| comp85813_c0_seq isoform a                               | 0.075161 | 0        | 0 | 0.027178 | 0.000    | < 0.0001 | Infinity | 0.009    |
| comp88730_c0_seq iron zinc purple acid phosphatase-li    | 0.034667 | 0        | 0 | 0        | 0.000    | 0.009    |          |          |
| comp79297_c0_seq 26s protease regulatory subunit 4-lii   | 0        | 0        | 0 | 0.0476   |          |          | Infinity | < 0.0001 |
| comp89783_c0_seq leucine-rich repeat-containing prote    | 0.029989 | 0        | 0 | 0        | 0.000    | 0.002    |          |          |
| comp78851_c0_seq rab gdp-dissociation inhibitor          | 0.0837   | 0.066956 | 0 | 0.105644 | 0.800    | 0.420    | Infinity | < 0.0001 |
| comp87524_c2_seq argininosuccinate synthase              | 0.044333 | 0        | 0 | 0.258022 | 0.000    | 0.005    | Infinity | 0.042    |
| comp90955_c0_seq cop9 signalosome complex subunit        | 0        | 0        | 0 | 0.286667 |          |          | Infinity | 0.002    |
| comp86462_c0_seq eukaryotic translation initiation factc | 0        | 0        | 0 | 0.081556 |          |          | Infinity | 0.003    |
| comp82307_c0_seq yellow-x                                | 0.048693 | 0.045967 | 0 | 0.025056 | 0.944    | 0.855    | Infinity | 0.009    |
| comp84197_c0_seq pwwp domain-containing protein 2b       | 0        | 0        | 0 | 0.021344 |          |          | Infinity | 0.022    |
| comp89329_c0_seq protein notum homolog                   | 0.085778 | 0        | 0 | 0        | 0.000    | < 0.0001 |          |          |
| comp82478_c0_seq yellow-d                                | 0        | 0        | 0 | 0.1176   |          |          | Infinity | < 0.0001 |
| comp90604_c0_seq heat shock protein 70                   | 0.100367 | 0        | 0 | 0.059356 | 0.000    | 0.012    | Infinity | 0.000    |
| comp80293_c2_seq tubulin alpha-1 chain                   | 0.261633 | 0.273444 | 0 | 0.527111 | 1.045    | 0.816    | Infinity | < 0.0001 |
| comp85149_c0_seq 26s proteasome non-atpase regulai       | 0        | 0        | 0 | 0.061967 |          |          | Infinity | < 0.0001 |
| comp83577_c0_seq PREDICTED: lachesin-like                | 0        | 0.047856 | 0 | 0        | Infinity | < 0.0001 |          |          |
| comp80120_c0_seq protein split ends-like                 | 0.055111 | 0        | 0 | 0        | 0.000    | 0.023    |          |          |
| comp81744_c0_seq nadh:ubiquinone na(+)- c subunit        | 0.305833 | 0.262522 | 0 | 0.138456 | 0.858    | 0.670    | Infinity | < 0.0001 |
| comp88508_c0_seq protein unzipped-like                   | 0.049296 | 0        | 0 | 0        | 0.000    | 0.000    |          |          |
| comp89425_c0_seq yellow-f                                | 0.041666 | 0        | 0 | 0        | 0.000    | 0.000    |          |          |
| comp90945_c0_seq fibulin 1                               | 0.074356 | 0        | 0 | 0.063622 | 0.000    | 0.002    | Infinity | 0.008    |
| comp84135_c1_seq g-protein coupled receptor mth2         | 0.234833 | 0.031144 | 0 | 0        | 0.133    | < 0.0001 |          |          |
| comp84624_c0_seq isoform a                               | 0        | 0        | 0 | 0.021949 |          |          | Infinity | 0.012    |
| comp90963_c0_seq fk506-binding protein 59                | 0.019532 | 0        | 0 | 0.032278 | 0.000    | 0.016    | Infinity | 0.001    |
| comp83784_c0_seq vacuolar atp synthase subunit h         | 0        | 0        | 0 | 0.024422 |          |          | Infinity | 0.007    |
| comp90340_c0_seq maltose phosphorylase                   | 0        | 0        | 0 | 0.012803 |          |          | Infinity | 0.023    |
| comp85542_c0_seq selenium-binding protein                | 0.055388 | 0.067733 | 0 | 0.167456 | 1.223    | 0.589    | Infinity | < 0.0001 |

|                                                        |          |          |   |          |          |          |          |          |
|--------------------------------------------------------|----------|----------|---|----------|----------|----------|----------|----------|
| comp90005_c0_seq equilibrative nucleoside transporter  | 0.068956 | 0        | 0 | 0        | 0.000    | 0.003    |          |          |
| comp91525_c0_seq cadherin partial                      | 0.039156 | 0        | 0 | 0        | 0.000    | 0.000    |          |          |
| comp84894_c1_seq hexokinase type 2                     | 0.033837 | 0        | 0 | 0        | 0.000    | 0.007    |          |          |
| comp87301_c0_seq 6-phosphogluconate dehydrogenas       | 0.109222 | 0.105878 | 0 | 0.340267 | 0.969    | 0.868    | Infinity | < 0.0001 |
| comp85334_c0_seq bleomycin hydrolase                   | 0.236911 | 0        | 0 | 0.049011 | 0.000    | < 0.0001 | Infinity | < 0.0001 |
| comp83310_c0_seq isoform d                             | 0.120444 | 0.042867 | 0 | 0.028389 | 0.356    | 0.039    | Infinity | < 0.0001 |
| comp82470_c0_seq protein disulfide-isomerase like prot | 0        | 0        | 0 | 0.0483   |          |          | Infinity | < 0.0001 |
| comp83696_c0_seq beta- -glucan recognition protein 2   | 0.135033 | 0.297111 | 0 | 0.131789 | 2.200    | 0.006    | Infinity | < 0.0001 |
| comp90640_c0_seq probable g-protein coupled receptor   | 0.091067 | 0        | 0 | 0        | 0.000    | < 0.0001 |          |          |
| comp81382_c0_seq adenylosuccinate lyase-like           | 0        | 0        | 0 | 0.042972 |          |          | Infinity | < 0.0001 |
| comp84637_c0_seq probable 26s proteasome non-atpa      | 0        | 0        | 0 | 0.054422 |          |          | Infinity | < 0.0001 |
| comp85222_c0_seq vacuolar h                            | 0        | 0.066467 | 0 | 0.182244 | Infinity | < 0.0001 | Infinity | < 0.0001 |
| comp85580_c0_seq protein disulfide isomerase           | 0.044201 | 0.084022 | 0 | 0.211778 | 1.901    | 0.053    | Infinity | < 0.0001 |
| comp91533_c0_seq tolloid-like protein 2-like           | 0.052878 | 0        | 0 | 0        | 0.000    | < 0.0001 |          |          |
| comp82711_c0_seq serine protease -like                 | 0.033789 | 0        | 0 | 0        | 0.000    | 0.002    |          |          |
| comp83900_c0_seq venom serine carboxypeptidase-like    | 0        | 0.0274   | 0 | 0.071511 | Infinity | 0.010    | Infinity | 0.013    |
| comp88517_c0_seq protein eva-1-like                    | 0.083367 | 0.00588  | 0 | 0        | 0.071    | < 0.0001 |          |          |
| comp88987_c0_seq ccr4-not transcription complex subu   | 0        | 0        | 0 | 0.068311 |          |          | Infinity | < 0.0001 |
| comp89711_c0_seq g protein-coupled receptor            | 0.021141 | 0        | 0 | 0        | 0.000    | 0.030    |          |          |
| comp83319_c0_seq cysteine synthase                     | 0.012656 | 0        | 0 | 0        | 0.000    | 0.001    |          |          |
| comp88483_c0_seq ugp                                   | 0.040862 | 0.117967 | 0 | 0.208556 | 2.887    | 0.312    | Infinity | < 0.0001 |
| comp79679_c0_seq aminopeptidase -like                  | 0.064359 | 0.033022 | 0 | 0.055378 | 0.513    | 0.007    | Infinity | < 0.0001 |
| comp88360_c0_seq protein singed-like                   | 0        | 0        | 0 | 0.015189 |          |          | Infinity | 0.002    |
| comp83266_c0_seq inosine-5 -monophosphate dehydro      | 0.038012 | 0        | 0 | 0.024917 | 0.000    | 0.098    | Infinity | 0.002    |
| comp88583_c0_seq heparanase-like protein               | 0.028317 | 0        | 0 | 0        | 0.000    | 0.003    |          |          |
| comp95705_c0_seq adenosine deaminase related growi     | 0.148322 | 0        | 0 | 0        | 0.000    | < 0.0001 |          |          |
| comp88456_c0_seq 3-oxoacid transferase 1               | 0        | 0        | 0 | 0.045644 |          |          | Infinity | 0.014    |
| comp86614_c0_seq g-protein coupled receptor mth2-lik   | 0.04831  | 0        | 0 | 0        | 0.000    | < 0.0001 |          |          |
| comp86452_c0_seq antitrypsin isoform 2                 | 0.013799 | 0        | 0 | 0        | 0.000    | < 0.0001 |          |          |
| comp89102_c0_seq pyruvate kinase                       | 0.07272  | 0.109122 | 0 | 0.221667 | 1.501    | 0.024    | Infinity | < 0.0001 |
| comp90682_c0_seq pancreatic triacylglycerol lipase     | 0        | 0.092389 | 0 | 0        | Infinity | < 0.0001 |          |          |
| comp88924_c0_seq probable aminopeptidase npep1-lik     | 0.018259 | 0        | 0 | 0.031267 | 0.000    | 0.001    | Infinity | 0.001    |
| comp89530_c0_seq chaperonin subunit 6a zeta            | 0        | 0.050367 | 0 | 0.219722 | Infinity | 0.005    | Infinity | 0.000    |
| comp89440_c0_seq arylsulfatase b-like                  | 0.07007  | 0        | 0 | 0        | 0.000    | 0.000    |          |          |

|                                                            |          |          |   |          |          |          |          |          |
|------------------------------------------------------------|----------|----------|---|----------|----------|----------|----------|----------|
| comp89962_c1_seq t-complex protein 1 subunit beta-like     | 0.008578 | 0.027433 | 0 | 0.166111 | 3.198    | 0.079    | Infinity | < 0.0001 |
| comp88457_c0_seq transmembrane protein c9orf5-like         | 0.024115 | 0        | 0 | 0        | 0.000    | 0.006    |          |          |
| comp88942_c0_seq t-complex protein 1 subunit gamma         | 0.026367 | 0.102356 | 0 | 0.339556 | 3.882    | 0.086    | Infinity | < 0.0001 |
| comp83821_c0_seq eukaryotic translation initiation factor  | 0        | 0        | 0 | 0.069911 |          |          | Infinity | < 0.0001 |
| comp85806_c0_seq lipase 3                                  | 0.059873 | 0.293556 | 0 | 0.208556 | 4.903    | < 0.0001 | Infinity | < 0.0001 |
| comp90657_c1_seq t-complex protein 1 subunit epsilon       | 0        | 0        | 0 | 0.104133 |          |          | Infinity | < 0.0001 |
| comp89020_c0_seq t-complex protein 1 subunit eta-like      | 0        | 0.048678 | 0 | 0.248667 | Infinity | < 0.0001 | Infinity | < 0.0001 |
| comp84567_c0_seq t-complex protein 1 subunit theta         | 0        | 0.039233 | 0 | 0.226778 | Infinity | 0.003    | Infinity | < 0.0001 |
| comp1044034_c0_s bile salt-activated lipase-like           | 0        | 0.024011 | 0 | 0        | Infinity | 0.022    |          |          |
| comp89031_c0_seq protein tweety-like                       | 0.056428 | 0        | 0 | 0        | 0.000    | < 0.0001 |          |          |
| comp87097_c0_seq division abnormally delayed               | 0.040178 | 0        | 0 | 0        | 0.000    | < 0.0001 |          |          |
| comp86885_c0_seq asparagine synthetase                     | 0.003433 | 0        | 0 | 0.007922 | 0.000    | 0.116    | Infinity | 0.028    |
| comp81089_c0_seq glutamate dehydrogenase                   | 0        | 0        | 0 | 0.037444 |          |          | Infinity | < 0.0001 |
| comp87963_c0_seq antennal esterase cxe10                   | 0.039089 | 0        | 0 | 0        | 0.000    | 0.012    |          |          |
| comp88016_c0_seq t-complex protein 1 subunit alpha-like    | 0        | 0        | 0 | 0.211244 |          |          | Infinity | < 0.0001 |
| comp90112_c0_seq PREDICTED: uncharacterized protein        | 0        | 0.010022 | 0 | 0        | Infinity | 0.007    |          |          |
| comp78869_c0_seq heat shock protein 70                     | 0        | 0        | 0 | 0.298222 |          |          | Infinity | 0.012    |
| comp86227_c0_seq antennal esterase cxe5                    | 0        | 0        | 0 | 0.036344 |          |          | Infinity | 0.001    |
| comp86227_c0_seq antennal esterase cxe5                    | 0.046481 | 0.068089 | 0 | 0.033444 | 1.465    | 0.082    | Infinity | 0.009    |
| comp87141_c2_seq plexin domain-containing protein 2-like   | 0.013798 | 0        | 0 | 0        | 0.000    | 0.016    |          |          |
| comp77165_c0_seq dynein intermediate chain ciliary-like    | 0.086667 | 0        | 0 | 0        | 0.000    | 0.006    |          |          |
| comp86867_c0_seq trehalase 1a                              | 0.167842 | 0.192556 | 0 | 0.324889 | 1.147    | 0.391    | Infinity | < 0.0001 |
| comp82536_c0_seq heat shock protein 60                     | 0.039366 | 0        | 0 | 0.150778 | 0.000    | < 0.0001 | Infinity | < 0.0001 |
| comp84132_c0_seq glucose dehydrogenase                     | 0.012844 | 0        | 0 | 0        | 0.000    | 0.012    |          |          |
| comp87809_c0_seq glucose dehydrogenase                     | 0.092477 | 0        | 0 | 0        | 0.000    | 0.000    |          |          |
| comp80082_c0_seq fish- isoform c                           | 0.346    | 0.077522 | 0 | 0.048956 | 0.224    | < 0.0001 | Infinity | 0.001    |
| comp86084_c0_seq glucose dehydrogenase                     | 0.017413 | 0        | 0 | 0        | 0.000    | 0.003    |          |          |
| comp89763_c0_seq lysyl-trna synthetase                     | 0        | 0        | 0 | 0.013411 |          |          | Infinity | 0.008    |
| comp84798_c0_seq phosphoglucose isomerase                  | 0.110693 | 0.106611 | 0 | 0.410222 | 0.963    | 0.823    | Infinity | < 0.0001 |
| comp85560_c0_seq phenylalanyl-trna synthetase beta subunit | 0.007127 | 0        | 0 | 0.017289 | 0.000    | 0.031    | Infinity | 0.001    |
| comp81742_c0_seq protein asteroid-like                     | 0        | 0.044411 | 0 | 0        | Infinity | < 0.0001 |          |          |
| comp87961_c0_seq serine threonine-protein phosphatase      | 0        | 0.014044 | 0 | 0        | Infinity | 0.000    |          |          |
| comp90259_c0_seq collagen alpha-2 chain-like               | 0.238778 | 0        | 0 | 0        | 0.000    | < 0.0001 |          |          |
| comp90051_c0_seq disulfide oxidoreductase                  | 0.201544 | 0.062011 | 0 | 0.024689 | 0.308    | 0.001    | Infinity | 0.006    |

|                                                         |          |          |   |          |          |          |          |          |
|---------------------------------------------------------|----------|----------|---|----------|----------|----------|----------|----------|
| comp87654_c0_seq ecdysone oxidase                       | 0        | 0        | 0 | 0.013189 |          |          | Infinity | 0.008    |
| comp88102_c0_seq chitinase                              | 0.018311 | 0        | 0 | 0        | 0.000    | 0.022    |          |          |
| comp87496_c0_seq phosphoglucomutase-2-like              | 0.009118 | 0        | 0 | 0        | 0.000    | 0.028    |          |          |
| comp80318_c0_seq polyadenylate-binding protein 1-like   | 0.004401 | 0        | 0 | 0.076189 | 0.000    | 0.213    | Infinity | 0.000    |
| comp90705_c0_seq cell division cycle and apoptosis reg  | 0        | 0        | 0 | 0.0075   |          |          | Infinity | 0.033    |
| comp89004_c0_seq lamin dm0-like                         | 0        | 0        | 0 | 0.040067 |          |          | Infinity | 0.008    |
| comp88503_c0_seq vacuolar atp synthase catalytic subu   | 0.017773 | 0.068811 | 0 | 0.223444 | 3.872    | < 0.0001 | Infinity | < 0.0001 |
| comp89549_c0_seq glycosyl hydrolase family 31 protein   | 0.034504 | 0        | 0 | 0        | 0.000    | 0.000    |          |          |
| comp88613_c0_seq glucose dehydrogenase                  | 0        | 0.022056 | 0 | 0.083111 | Infinity | 0.009    | Infinity | 0.001    |
| comp88443_c0_seq thrombospondin type-1 domain-con       | 0.045722 | 0        | 0 | 0        | 0.000    | 0.000    |          |          |
| comp90177_c0_seq fimbrin plastin                        | 0        | 0        | 0 | 0.012897 |          |          | Infinity | 0.016    |
| comp82481_c0_seq xanthine dehydrogenase oxidase         | 0        | 0        | 0 | 0.008756 |          |          | Infinity | 0.008    |
| comp85739_c0_seq polycomb protein scm-like              | 0        | 0.036411 | 0 | 0        | Infinity | 0.049    |          |          |
| comp82105_c0_seq i                                      | 0.049282 | 0        | 0 | 0        | 0.000    | 0.025    |          |          |
| comp86348_c0_seq heat shock cognate 70 protein          | 0        | 0.288    | 0 | 0.650444 | Infinity | < 0.0001 | Infinity | < 0.0001 |
| comp89495_c0_seq isoform c                              | 0.433333 | 0.391444 | 0 | 0.281889 | 0.903    | 0.376    | Infinity | < 0.0001 |
| comp89852_c0_seq tartan capricious-like protein         | 0.062    | 0        | 0 | 0        | 0.000    | 0.024    |          |          |
| comp96043_c0_seq leucine-rich repeats and immunogl      | 0.186133 | 0.175889 | 0 | 0.034411 | 0.945    | 0.819    | Infinity | 0.001    |
| comp91233_c0_seq #NAME?                                 | 0        | 0        | 0 | 0.022552 |          |          | Infinity | 0.000    |
| comp88148_c0_seq neutral ceramidase-like                | 0.101733 | 0.046311 | 0 | 0.107578 | 0.455    | 0.003    | Infinity | < 0.0001 |
| comp88280_c0_seq sphingomyelin phosphodiesterase        | 0.051244 | 0.058811 | 0 | 0.072722 | 1.148    | 0.317    | Infinity | < 0.0001 |
| comp84058_c0_seq eukaryotic translation initiation fact | 0        | 0        | 0 | 0.070567 |          |          | Infinity | < 0.0001 |
| comp88576_c0_seq hypothetical protein KGM_14136         | 0        | 0.093933 | 0 | 0.032056 | Infinity | 0.006    | Infinity | 0.040    |
| comp79094_c0_seq tyrosine-protein phosphatase 10d-li    | 0.028799 | 0        | 0 | 0        | 0.000    | 0.000    |          |          |
| comp85065_c0_seq acylamino-acid-releasing enzyme-lil    | 0        | 0        | 0 | 0.016653 |          |          | Infinity | 0.018    |
| comp88625_c0_seq dipeptidyl peptidase iii               | 0.098867 | 0.035111 | 0 | 0.166333 | 0.355    | < 0.0001 | Infinity | < 0.0001 |
| comp93268_c0_seq procollagen- -oxoglutarate 5-dioxyg    | 0        | 0.0281   | 0 | 0        | Infinity | 0.001    |          |          |
| comp91365_c0_seq fibril-forming collagen alpha chain-li | 0.023344 | 0        | 0 | 0        | 0.000    | 0.047    |          |          |
| comp90341_c0_seq semaphorin-1a-like protein             | 0.013713 | 0        | 0 | 0        | 0.000    | 0.009    |          |          |
| comp86751_c0_seq metal transporter cnm2-like            | 0.053811 | 0        | 0 | 0        | 0.000    | < 0.0001 |          |          |
| comp87469_c0_seq prolyl endopeptidase                   | 0.030883 | 0        | 0 | 0.068951 | 0.000    | 0.007    | Infinity | 0.021    |
| comp91278_c0_seq transferrin                            | 0.1344   | 0.236    | 0 | 0.110789 | 1.756    | 0.091    | Infinity | < 0.0001 |
| comp89797_c0_seq iron-responsive element-binding prc    | 0.017833 | 0        | 0 | 0        | 0.000    | 0.011    |          |          |
| comp89050_c0_seq amphoterin-induced protein 2           | 0.037556 | 0        | 0 | 0        | 0.000    | < 0.0001 |          |          |



|                                                          |          |          |   |          |          |          |          |          |
|----------------------------------------------------------|----------|----------|---|----------|----------|----------|----------|----------|
| comp90648_c0_seq elongator complex protein 2             | 0        | 0.772    | 0 | 0        | Infinity | 0.015    |          |          |
| comp90184_c1_seq dnaj homolog subfamily c member         | 0        | 0.037933 | 0 | 0        | Infinity | 0.013    |          |          |
| comp90475_c0_seq fasciclin ii transmembrane isoform      | 0.127933 | 0.064556 | 0 | 0.03045  | 0.505    | 0.002    | Infinity | < 0.0001 |
| comp87899_c0_seq transitional endoplasmic reticulum ε    | 0.049867 | 0.043556 | 0 | 0.248889 | 0.873    | 0.425    | Infinity | < 0.0001 |
| comp88905_c0_seq heat shock 70 kda protein 4l-like       | 0.013067 | 0        | 0 | 0.139767 | 0.000    | 0.040    | Infinity | < 0.0001 |
| comp90211_c0_seq isoform c                               | 0.089489 | 0.0563   | 0 | 0.100989 | 0.629    | 0.093    | Infinity | 0.036    |
| comp91586_c0_seq neurogenic locus notch                  | 0.016711 | 0        | 0 | 0        | 0.000    | 0.033    |          |          |
| comp88989_c0_seq colmedin                                | 0.062167 | 0.051256 | 0 | 0.0422   | 0.824    | 0.307    | Infinity | 0.000    |
| comp88100_c0_seq isoform b                               | 0.017584 | 0.055078 | 0 | 0.005478 | 3.132    | < 0.0001 | Infinity | 0.027    |
| comp89392_c0_seq glycogen phosphorylase                  | 0.050018 | 0.022511 | 0 | 0.071467 | 0.450    | 0.233    | Infinity | < 0.0001 |
| comp78190_c0_seq nonclathrin coat protein gamma1-c       | 0        | 0        | 0 | 0.014267 |          |          | Infinity | 0.002    |
| comp88081_c0_seq multidrug resistance-associated prc     | 0        | 0        | 0 | 0.026022 |          |          | Infinity | 0.025    |
| comp91604_c0_seq hmct_bommo ame: full=hemocytin          | 0.804667 | 0.115744 | 0 | 0.029489 | 0.144    | 0.001    | Infinity | 0.008    |
| comp71873_c0_seq long form-like                          | 0        | 0.021933 | 0 | 0        | Infinity | 0.001    |          |          |
| comp80514_c0_seq prominin-like protein                   | 0.125133 | 0        | 0 | 0.016027 | 0.000    | < 0.0001 | Infinity | 0.022    |
| comp89202_c0_seq beta-mannosidase-like                   | 0        | 0.013567 | 0 | 0        | Infinity | 0.023    |          |          |
| comp89797_c0_seq iron-responsive element-binding prc     | 0        | 0        | 0 | 0.020211 |          |          | Infinity | 0.029    |
| comp92164_c0_seq ebna2 binding protein p100              | 0.007224 | 0        | 0 | 0.070389 | 0.000    | 0.023    | Infinity | < 0.0001 |
| comp91192_c0_seq sticks and isoform a                    | 0.029067 | 0        | 0 | 0        | 0.000    | 0.001    |          |          |
| comp86149_c0_seq isoform a                               | 0        | 0        | 0 | 0.022297 |          |          | Infinity | 0.020    |
| comp91016_c0_seq 10-formyltetrahydrofolate dehydrog      | 0.093589 | 0.082878 | 0 | 0.291445 | 0.886    | 0.544    | Infinity | 0.001    |
| comp90652_c0_seq nucleolar protein 14 homolog            | 0.091041 | 0.195444 | 0 | 0.761444 | 2.147    | 0.001    | Infinity | < 0.0001 |
| comp89221_c0_seq alanyl-trna synthetase                  | 0        | 0        | 0 | 0.004573 |          |          | Infinity | 0.028    |
| comp87118_c0_seq 26s proteasome non-atpase regulat       | 0        | 0        | 0 | 0.039922 |          |          | Infinity | < 0.0001 |
| comp91349_c0_seq voltage-dependent calcium channel       | 0.210333 | 0        | 0 | 0        | 0.000    | < 0.0001 |          |          |
| comp91330_c0_seq huntingtin interacting protein 1        | 0        | 0.081889 | 0 | 0        | Infinity | 0.024    |          |          |
| comp89236_c0_seq ubiquitin-activating enzyme e1          | 0        | 0        | 0 | 0.065603 |          |          | Infinity | 0.002    |
| comp89105_c0_seq 150 kda dynein-associated polypep       | 0.121433 | 0.214667 | 0 | 0.124444 | 1.768    | 0.298    | Infinity | 0.002    |
| comp91526_c0_seq phosphoribosylamine-glycine ligase      | 0.012098 | 0        | 0 | 0        | 0.000    | 0.022    |          |          |
| comp91279_c0_seq atp-citrate synthase-like               | 0.2461   | 0.053533 | 0 | 1.301444 | 0.218    | 0.029    | Infinity | 0.003    |
| comp82649_c0_seq importin beta-3                         | 0        | 0        | 0 | 0.0087   |          |          | Infinity | 0.029    |
| comp88838_c0_seq eukaryotic translation initiation factc | 0        | 0        | 0 | 0.083589 |          |          | Infinity | < 0.0001 |
| comp89960_c0_seq limkain b1                              | 0.084856 | 0.023822 | 0 | 0        | 0.281    | 0.017    |          |          |
| comp91173_c0_seq structural maintenance of chromosc      | 0        | 0        | 0 | 0.050432 |          |          | Infinity | 0.046    |

|                                                       |          |          |   |          |          |          |          |          |
|-------------------------------------------------------|----------|----------|---|----------|----------|----------|----------|----------|
| comp83380_c2_seq collagen alpha-2 chain               | 1.197111 | 0        | 0 | 0        | 0.000    | < 0.0001 |          |          |
| comp85327_c0_seq rna-binding protein 12               | 0.711222 | 0        | 0 | 0        | 0.000    | < 0.0001 |          |          |
| comp90132_c0_seq aldehyde oxidase                     | 0.007834 | 0        | 0 | 0        | 0.000    | 0.033    |          |          |
| comp90809_c0_seq extracellular domains-containing pri | 0        | 0.027922 | 0 | 0        | Infinity | < 0.0001 |          |          |
| comp89868_c0_seq furin-like protease 2-like           | 0.108789 | 0        | 0 | 0.012838 | 0.000    | 0.005    | Infinity | 0.002    |
| comp89895_c0_seq phosphoribosylformylglycinamide      | 0        | 0        | 0 | 0.020182 |          |          | Infinity | < 0.0001 |
| comp88886_c0_seq tripeptidyl-peptidase 2              | 0        | 0        | 0 | 0.032167 |          |          | Infinity | < 0.0001 |
| comp91513_c0_seq xanthine dehydrogenase               | 0        | 0        | 0 | 0.025609 |          |          | Infinity | 0.006    |
| comp90493_c0_seq down syndrome cell adhesion mole     | 0.027311 | 0        | 0 | 0        | 0.000    | 0.002    |          |          |
| comp91526_c0_seq phosphoribosylamine-glycine ligase   | 0        | 0        | 0 | 0.035478 |          |          | Infinity | 0.026    |
| comp91603_c0_seq hemicentin-1-like                    | 0.049122 | 0        | 0 | 0        | 0.000    | < 0.0001 |          |          |
| comp90945_c0_seq fibulin 1 and                        | 0        | 0.034522 | 0 | 0        | Infinity | 0.010    |          |          |
| comp91427_c0_seq latrophilin cir1-like isoform 1      | 0.681222 | 0        | 0 | 0        | 0.000    | < 0.0001 |          |          |
| comp87765_c0_seq probable atp-dependent rna helicase  | 0        | 10.43778 | 0 | 0        | Infinity | 0.050    |          |          |
| comp91484_c0_seq bifunctional glutamate proline--trna | 0        | 0.032594 | 0 | 0.077267 | Infinity | 0.259    | Infinity | < 0.0001 |
| comp86547_c0_seq clathrin heavy chain                 | 0        | 0        | 0 | 0.086478 |          |          | Infinity | < 0.0001 |
| comp91493_c0_seq isoform partial                      | 0.107867 | 0.01733  | 0 | 0.027144 | 0.161    | < 0.0001 | Infinity | 0.003    |
| comp86570_c0_seq myosin heavy isoform d               | 0        | 0.333111 | 0 | 0        | Infinity | 0.001    |          |          |
| comp90924_c0_seq low quality protein: myosin heavy nc | 0        | 0        | 0 | 0.032389 |          |          | Infinity | < 0.0001 |
| comp91506_c0_seq translational activator gcn1         | 0        | 0        | 0 | 0.008698 |          |          | Infinity | 0.036    |
| comp90478_c0_seq sortilin-related receptor-like       | 0.015109 | 0        | 0 | 0.029944 | 0.000    | 0.127    | Infinity | 0.002    |
| comp91619_c0_seq carbamoyl-phosphate synthase larg    | 0.044718 | 0        | 0 | 0.034241 | 0.000    | 0.006    | Infinity | 0.000    |
| comp90846_c0_seq spectrin beta chain                  | 0        | 0        | 0 | 0.019622 |          |          | Infinity | 0.000    |
| comp91571_c0_seq spectrin alpha chain                 | 0        | 0        | 0 | 0.030967 |          |          | Infinity | < 0.0001 |
| comp91621_c0_seq odd oz protein                       | 0.161267 | 0.0178   | 0 | 0        | 0.110    | < 0.0001 |          |          |
| comp91648_c0_seq muscle-specific protein isoform k    | 0        | 0.020822 | 0 | 0        | Infinity | 0.002    |          |          |
| comp91624_c0_seq dynein heavy chain                   | 0        | 0        | 0 | 0.020856 |          |          | Infinity | < 0.0001 |
| comp79903_c0_seq amylase partial                      | 0        | 0.055011 | 0 | 0        | Infinity | 0.043    |          |          |
| comp91678_c0_seq ribosomal protein s29                | 0        | 0        | 0 | 0.148111 |          |          | Infinity | 0.001    |
| comp80529_c0_seq cecropin b                           | 0        | 0.066812 | 0 | 0        | Infinity | 0.000    |          |          |
| comp8680_c0_seq1 collagen alpha-2 chain-like          | 0.387444 | 0.266    | 0 | 0.209767 | 0.687    | 0.611    | Infinity | 0.039    |
| comp84056_c0_seq sorbitol dehydrogenase               | 0        | 0.029067 | 0 | 0.082278 | Infinity | 0.001    | Infinity | 0.001    |
| comp85583_c1_seq lipopolysaccharide binding protein   | 0        | 0.045089 | 0 | 0        | Infinity | 0.001    |          |          |
| comp91365_c0_seq PREDICTED: uncharacterized prote     | 0        | 0        | 0 | 0.012311 |          |          | Infinity | 0.008    |

|                                                        |          |          |   |          |          |          |          |          |
|--------------------------------------------------------|----------|----------|---|----------|----------|----------|----------|----------|
| comp60971_c0_seq PREDICTED: uncharacterized prot       | 0.010889 | 0        | 0 | 0        | 0.000    | 0.027    |          |          |
| comp90885_c0_seq ecdysteroid 22-kinase                 | 0        | 0.172    | 0 | 0        | Infinity | 0.002    |          |          |
| comp73731_c0_seq odorant-binding protein               | 0.114978 | 0.052622 | 0 | 0.029456 | 0.458    | 0.122    | Infinity | 0.001    |
| comp83253_c1_seq short-chain partial                   | 0        | 0.020522 | 0 | 0        | Infinity | 0.001    |          |          |
| comp79202_c0_seq isoform b                             | 0.237889 | 0        | 0 | 0        | 0.000    | 0.001    |          |          |
| comp62692_c0_seq macrophage mannose receptor 1-III     | 0.1115   | 0        | 0 | 0        | 0.000    | 0.007    |          |          |
| comp70291_c0_seq ribosomal protein s21                 | 0        | 0        | 0 | 0.073822 |          |          | Infinity | 0.000    |
| comp47327_c0_seq 40s ribosomal protein s27             | 0        | 0        | 0 | 0.324422 |          |          | Infinity | < 0.0001 |
| comp75843_c0_seq acyl- binding protein                 | 0        | 0.137644 | 0 | 0.014456 | Infinity | 0.000    | Infinity | 0.033    |
| comp77138_c0_seq calponin transgelin                   | 0        | 0.031633 | 0 | 0        | Infinity | 0.032    |          |          |
| comp62047_c0_seq ribosomal protein l37a                | 0        | 0        | 0 | 0.029478 |          |          | Infinity | 0.024    |
| comp81679_c0_seq cysteine rich secreted                | 0.017949 | 0.036822 | 0 | 0.063567 | 2.052    | 0.168    | Infinity | 0.002    |
| comp83971_c0_seq diazepam binding inhibitor-like prote | 0.07953  | 0.148033 | 0 | 0.221778 | 1.861    | 0.068    | Infinity | < 0.0001 |
| comp27990_c0_seq ribosomal protein l37                 | 0        | 0        | 0 | 0.103889 |          |          | Infinity | 0.001    |
| comp82669_c1_seq diverged serine protease              | 0.018933 | 0        | 0 | 0        | 0.000    | 0.006    |          |          |
| comp85595_c0_seq organic cation transporter            | 0        | 0.022267 | 0 | 0        | Infinity | 0.026    |          |          |
| comp62202_c0_seq small nuclear ribonucleoprotein e     | 0        | 0        | 0 | 0.034    |          |          | Infinity | 0.001    |
| comp79251_c0_seq kazal-type proteinase inhibitor       | 0.256933 | 0.1456   | 0 | 0.225    | 0.567    | 0.461    | Infinity | < 0.0001 |
| comp70838_c0_seq acylphosphatase-2 isoform x1          | 0        | 0.016533 | 0 | 0.019    | Infinity | < 0.0001 | Infinity | 0.001    |
