# Supplementary material for: Inhibition of melanization by serpin-5 and serpin-9 promotes baculovirus infection in cotton bollworm Helicoverpa armigera
Source: PubMed Central journal article supplement (PMC5633200; doi:10.1371/journal.ppat.1006645), 2017-09-27
Supplement: ppat.1006645.s012.pdf [file ppat.1006645.s012.pdf]

**Supplementary Data 5. List of antibodies produced in this study**

| <b>Assembly No.</b> | <b>Protein</b> | <b>Expression vector</b> | <b>Immunogen</b> | <b>Antibody</b>   | <b>Dilution</b> | <b>M.W (kDa)</b> |
|---------------------|----------------|--------------------------|------------------|-------------------|-----------------|------------------|
| comp84005_c0_seq1   | cSP4           | pET-28a                  | Full length      | Rabbit polyclonal | 3000            | 36.8             |
| comp86273_c0_seq1   | cSP6           | pET-28a                  | Full length      | Rabbit polyclonal | 3000            | 45               |
| comp86780_c0_seq1   | cSP8           | pET-28a                  | Full length      | Rabbit polyclonal | 3000            | 39.5             |
| comp85451_c0_seq1   | cSP29          | pET-28a                  | Full length      | Rabbit polyclonal | 3000            | 42.2             |
| comp88491_c0_seq2   | PPO1           | pET-28a                  | Full length      | Rabbit polyclonal | 10000           | 78.6             |
| comp89077_c0_seq1   | PPO2           | pET-28a                  | Full length      | Rabbit polyclonal | 10000           | 80               |
| comp86728_c0_seq1   | serpin-5       | pET-28a                  | Full length      | Rabbit polyclonal | 5000            | 42.7             |
| comp86678_c0_seq1   | serpin-9       | pET-32a                  | Full length      | Rabbit polyclonal | 5000            | 43               |
