# Supplementary material for: Inhibition of melanization by serpin-5 and serpin-9 promotes baculovirus infection in cotton bollworm Helicoverpa armigera
Source: PubMed Central journal article supplement (PMC5633200; doi:10.1371/journal.ppat.1006645), 2017-09-27
Supplement: ppat.1006645.s013.pdf [file ppat.1006645.s013.pdf]

**Supplementary Data 6. Primers used for qPCR, protein expression, dsRNA synthesis and yeast two-hybrid assay.**

**Primers for qPCR**

|                 |                       |                       |
|-----------------|-----------------------|-----------------------|
| <b>cSP4</b>     | GGCAAACAGTTCAACCCAG   | CCCATCCAGTTATTGTAAGCG |
| <b>cSP6</b>     | GCAGAGTGGGCAACAAGAT   | CCAGCGGTCAGGACGTATT   |
| <b>cSP8</b>     | TCCCTTGGATGGCGTTGT    | CCACGTCTTGTTCGGTGTG   |
| <b>cSP29</b>    | CGTGCTGCCAGATGATAT    | CTTGCTGACGAGTGCTTAG   |
| <b>serpin-5</b> | CTGTGTACCCAGCTTTCAGAG | CTCGATGTAGGTGTTAGCGAT |
| <b>serpin-9</b> | CGCCTCAGACACCTCGCT    | CAGCGTGTCTCCAAGAAGAT  |
| <b>rpS3</b>     | ACGGAGTTTTCAAGCGGAA   | GACTGCTCCGGGATGTTGAA  |

**Primers for protein expression in the *E. coli* expression system**

|                 |                                          |                                           |
|-----------------|------------------------------------------|-------------------------------------------|
| <b>cSP4</b>     | GCATGACTGGTGGACAGGAAGATGTTGGCGAGAGCTGTAT | CTAGTTATTGCTCAGCGG TTAAGCGTTGGGCCACACGAC  |
| <b>cSP6</b>     | GCATGACTGGTGGACAGCAAAATCTTGCCAGACGC      | CTAGTTATTGCTCAGCGGTTAAGGAACAATAGTGGTCCT   |
| <b>cSP8</b>     | GCATGACTGGTGGACAGCAAAAGCAGCTGCGTCACACC   | CTAGTTATTGCTCAGCGGTCAGACATTCGTGTTTTGTAGCG |
| <b>cSP29</b>    | GCATGACTGGTGGACAGGCTAGTGTAGTGAAGATGATT   | CTAGTTATTGCTCAGCGGCTAGAAGCGCGCTTCTG       |
| <b>serpin-5</b> | GCATGACTGGTGGACAGCAAGTGGATTTCTATGAACG    | CTAGTTATTGCTCAGCGGTCATATACAGTAGGTTAG      |
| <b>serpin-9</b> | CGAATTCGAGCTCCGTCACTGCGACTTGAAGACGG      | GTGGTGGTGGTGGTGGTTAGAAGTCACTGGGCTTAGAAT   |
| <b>PPO1</b>     | CTAGTTATTGCTCAGCGGTCGGACGCCAAGAAGAACCTG  | CTAGTTATTGCTCAGCGGCCCGCCTCTGCTGCCTCGGTC   |
| <b>PPO2</b>     | CTAGTTATTGCTCAGCGGGCCGACGAAGAACAAT       | CTAGTTATTGCTCAGCGGTTAGTTGGTTCTTGGGTTCC    |

**Primers for protein expression in the *Drosophila* expression system**

|                           |                                                    |                                                             |
|---------------------------|----------------------------------------------------|-------------------------------------------------------------|
| <b>cSP4</b>               | CCGGAATTCGAAGATGTTGGCGAGAGCTGTATG                  | CTAGTCTAGAAGCGTTGGGCCACACG                                  |
| <b>cSP6</b>               | CCGGAATTCAAAAATCTTGCCAGACG                         | CTAGTCTAGAAGGAACAATAGTGGTCCTAATCCAGTCCAG                    |
| <b>cSP4<sub>xa1</sub></b> | CCGGAATTCGAAGATGTTGGCGAGAGCTGTATG                  | GCTGCCTCACCTCCCAAGATCCGGCCTTCTATAGGAGGTATACTTGATTG          |
| <b>cSP4<sub>xa2</sub></b> | CAATCAAGTATACCTCCTATAGAAGGCCGGATCTTGGGAGGTGAGGCAGC | CTAGTCTAGAAGCGTTGGGCCACACGACGCTCTCGATCCAGTC                 |
| <b>cSP6<sub>xa1</sub></b> | CCGGAATTCAAAAATCTTGCCAGACGCCAGC                    | CGCTGTACCTCCCACGATCCGGCCTTCTATTCTGCTGTCCAAACCAC             |
| <b>cSP6<sub>xa2</sub></b> | CTGTGGTTTGGACAGCAGAATAGAAGGCCGGATCGTGGGAGGTACAGCG  | CTAGTCTAGAAGGAACAATAGTGGTCCTAATCCAGTCCAGATATTCGTATACTTTGCTG |

**Primers for yeast-two hybrid analyses**

|                 |                                                |                                            |
|-----------------|------------------------------------------------|--------------------------------------------|
| <b>cSP4</b>     | CGTACCAGATTACGCTCATATG GAAGATGTTGGCGAGAGCTGTAT | GATTCATCTGCAGCTCGAGC TTAAGCGTTGGGCCACACGAC |
| <b>cSP6</b>     | CGTACCAGATTACGCTCATATG CAAAATCTTGCCAGACGC      | GATTCATCTGCAGCTCGAGC TTAAGGAACAATAGTGGTCCT |
| <b>cSP8</b>     | CGTACCAGATTACGCTCATATG GCTAGTGTTAGTGAAGATGATT  | GATTCATCTGCAGCTCGAGC CTAGAAGCGCGCTTCTG     |
| <b>serpin-5</b> | ATCTCAGAGGAGGACCTGCATATG CAAGTGGATTTCTATGAACG  | CGCTGCAGGTCGACGGAT TCAATATACAGTAGGTTAG     |
| <b>serpin-9</b> | ATCTCAGAGGAGGACCTGCATATG CAGTGGACTTGAAGACGG    | CGCTGCAGGTCGACGGAT TTAGAAGTCACTGGGCTTAGAAT |

---

**Primers for dsRNA synthesis**

---

Primers used for amplification  
contains T7 sequence at 5'

(TAATACGACTCACTATAGGG)

---

|                    |                       |                      |
|--------------------|-----------------------|----------------------|
| <b>T7-cSP4</b>     | GATGTTGGCGAGAGCTGTAT  | GGTGAAGTGTAGAGGTCTCT |
| <b>T7-cSP6</b>     | AGCGACAACAGTAGACCAAT  | GGCATCTGTCCTGGCTAAC  |
| <b>T7-cSP8</b>     | CCAATGTGGAGGTGTTCTGAT | CCTTCAGGTCTTCGCTTCAT |
| <b>T7-cSP29</b>    | GCCGAGACTAGAGGTTGTG   | CCTGACAAGCGTCCTTTC   |
| <b>T7-serpin-5</b> | AGCCCGCATCGCTAACAC    | TAGAAACGGCAGACGCCAC  |
| <b>T7-serpin-9</b> | TCAGACACCTCGCTCCAGG   | CCACTGTCCTTGGTCGATG  |
| <b>T7-GFP</b>      | CACAAGTTCAGCGTGTCCG   | GTTACACCTTGATGCCGTTT |

---
